# Supplementary material for: Oligostilbenes from Vatica mangachapoi with xanthine oxidase and acetylcholinesterase inhibitory activities
Source: Royal Society of Chemistry journal article supplement (doi:10.1039/c1ra00007a), 2011-01-01
Supplement: c1ra00007a.pdf [file c1ra00007a.pdf]

## Electronic Supplementary Information

# Oligostilbenes from *Vatica mangachapoi* with Xanthine Oxidase and Acetylcholinesterase Inhibitory Activities

Yan Hua Qin, Jie Zhang, Jiang Tao Cui, Zhi Kai Guo, Nan Jiang, Ren Xiang Tan and Hui Ming Ge

### Table of Contents

Figure S1  $^1\text{H}$ -NMR spectrum of compound **1** (DMSO- $d_6$ )

Figure S2  $^{13}\text{C}$ -NMR spectrum of compound **1** (DMSO- $d_6$ )

Figure S3 HMQC spectrum of compound **1** (DMSO- $d_6$ )

Figure S4 HMBC spectrum of compound **1** (DMSO- $d_6$ )

Figure S5  $^1\text{H}$ - $^1\text{H}$  COSY spectrum of compound **1** (DMSO- $d_6$ )

Figure S6 NOESY spectrum of compound **1** ((DMSO- $d_6$ )

Figure S7 HREIMS spectrum of compound **1** (positive mode)

Figure S8 FT-IR spectrum of compound **1** (KBr)

Figure S9 The theoretically predicted UV spectrum for **1**

Figure S10 UV spectrum of compound **1** (CH<sub>3</sub>OH)

Figure S11  $^1\text{H}$ -NMR spectrum of compound **2** (DMSO- $d_6$ )

Figure S12  $^{13}\text{C}$ -NMR spectrum of compound **2** (DMSO- $d_6$ )

Figure S13 HMQC spectrum of compound **2** (DMSO- $d_6$ )

Figure S14 HMBC spectrum of compound **2** (DMSO- $d_6$ )

Figure S15  $^1\text{H}$ - $^1\text{H}$  COSY spectrum of compound **2** (DMSO- $d_6$ )

Figure S16 NOESY spectrum of compound **2** ((DMSO- $d_6$ )

Figure S17 HREIMS spectrum of compound **2** (positive mode)

Figure S18 FT-IR spectrum of compound **2** (KBr)

Figure S19 UV spectrum of compound **2** (CH<sub>3</sub>OH)

Figure S20  $^1\text{H}$ -NMR spectrum of compound **3** (acetone- $d_6$ )

Figure S21  $^{13}\text{C}$ -NMR spectrum of compound **3** (acetone - $d_6$ )

Figure S22 HSQC spectrum of compound **3** (acetone - $d_6$ )

Figure S23 HMBC spectrum of compound **3** (acetone - $d_6$ )

Figure S24  $^1\text{H}$ - $^1\text{H}$  COSY spectrum of compound **3** (acetone - $d_6$ )

Figure S25 ROESY spectrum of compound **3** (acetone - $d_6$ )

Figure S26 HREIMS spectrum of compound **3** (positive mode)

Figure S27 FT-IR spectrum of compound **3** (KBr)

Figure S28 UV spectrum of compound **3** (CH<sub>3</sub>OH)

Table S1 The optimized structural information for **1** within polarizable continuum model

Table S2 TDDFT results for the optimized conformer of (7*bS*)-**1** (200nm< $\lambda$ <400nm)

Table S3 The optimized structural information for **2** within polarizable continuum model

Table S4 TDDFT results for the optimized conformer of (7*aR*, 8*aR*, 7*bR*)-**2** (200nm< $\lambda$ <400nm)

Table S5 The optimized structural information for **3** within polarizable continuum model

Table S6 TDDFT results for the optimized conformer of (7*aR*, 8*aR*)-**3** (200nm< $\lambda$ <400nm)

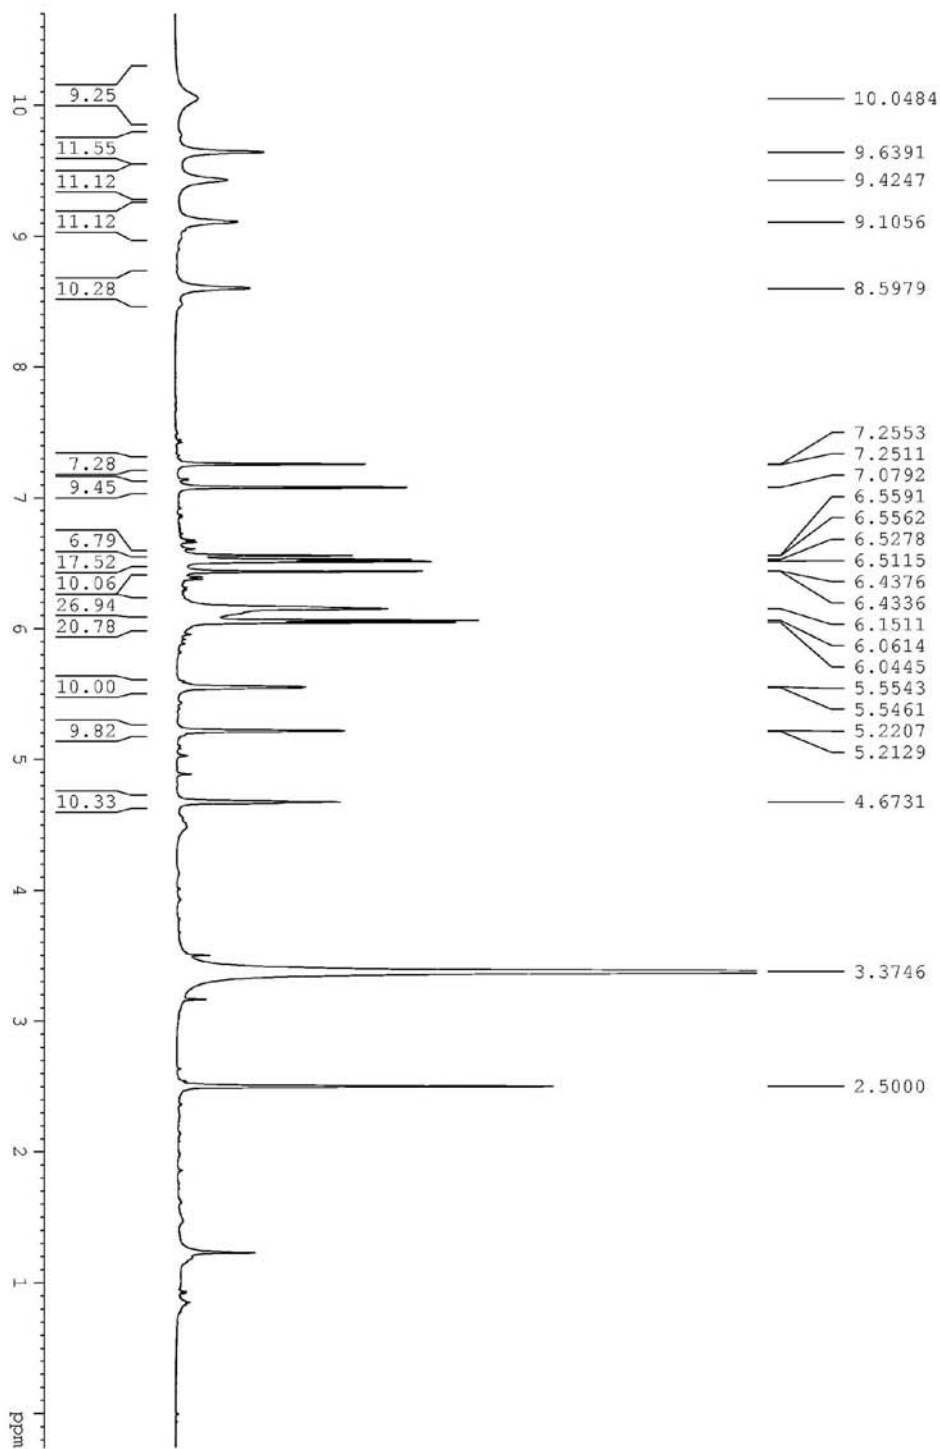

qyh-1 DMSO-d6 BRUKER DRX500 08-12-22

Figure S1  $^1\text{H-NMR}$  spectrum of compound **1** ( $\text{DMSO-}d_6$ )

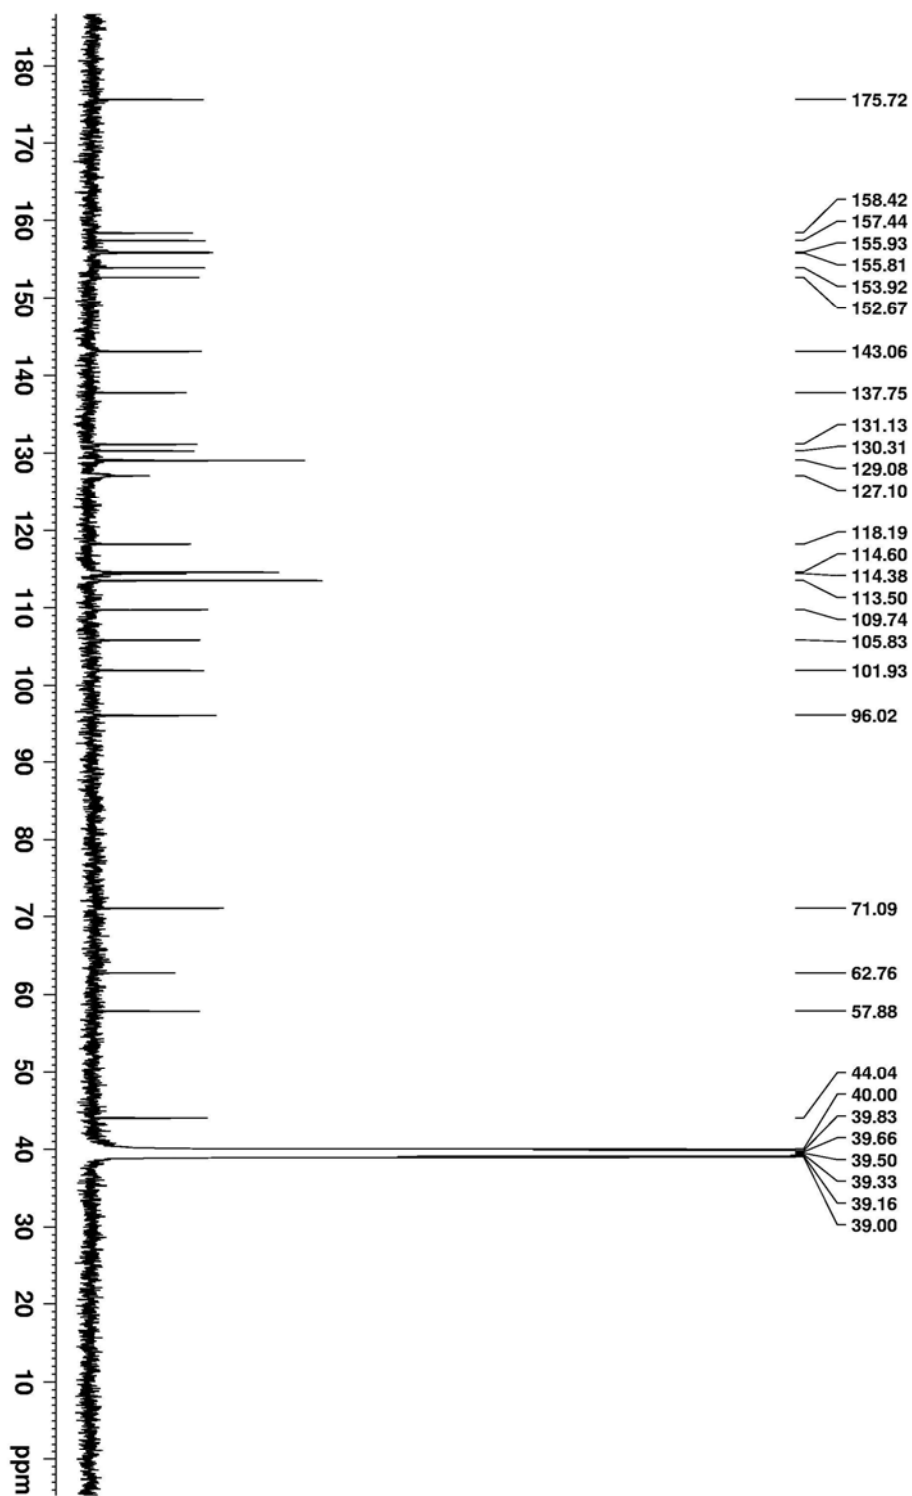

Figure S2  $^{13}\text{C}$ -NMR spectrum of compound **1** (DMSO- $d_6$ )

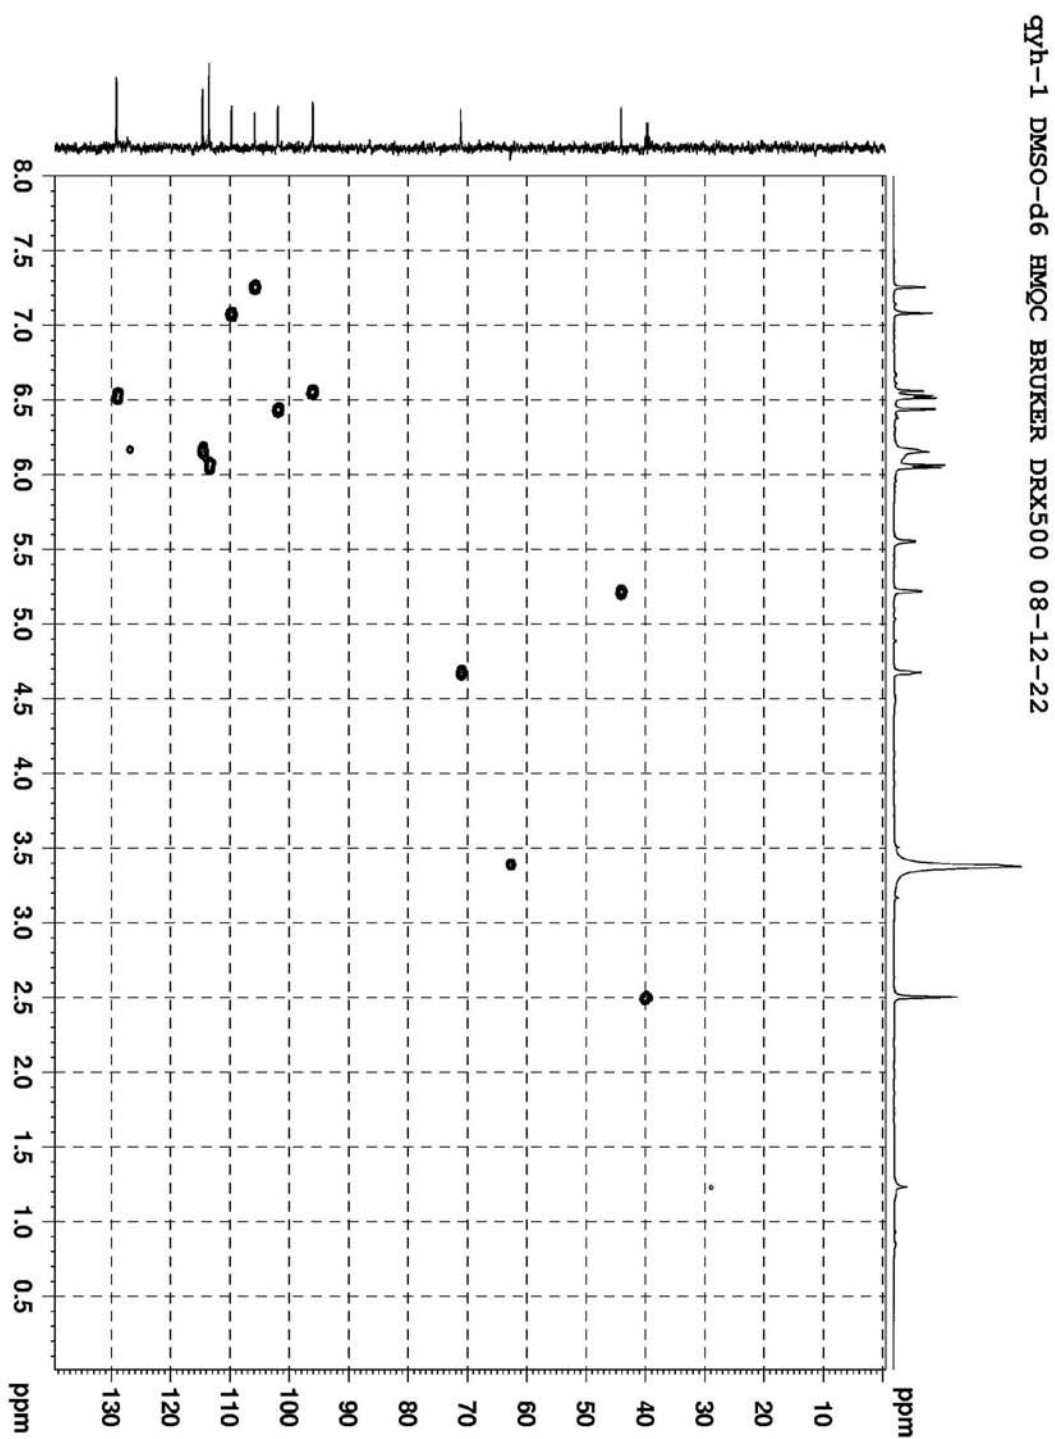

Figure S3 HMQC spectrum of compound **1** (DMSO-*d*<sub>6</sub>)

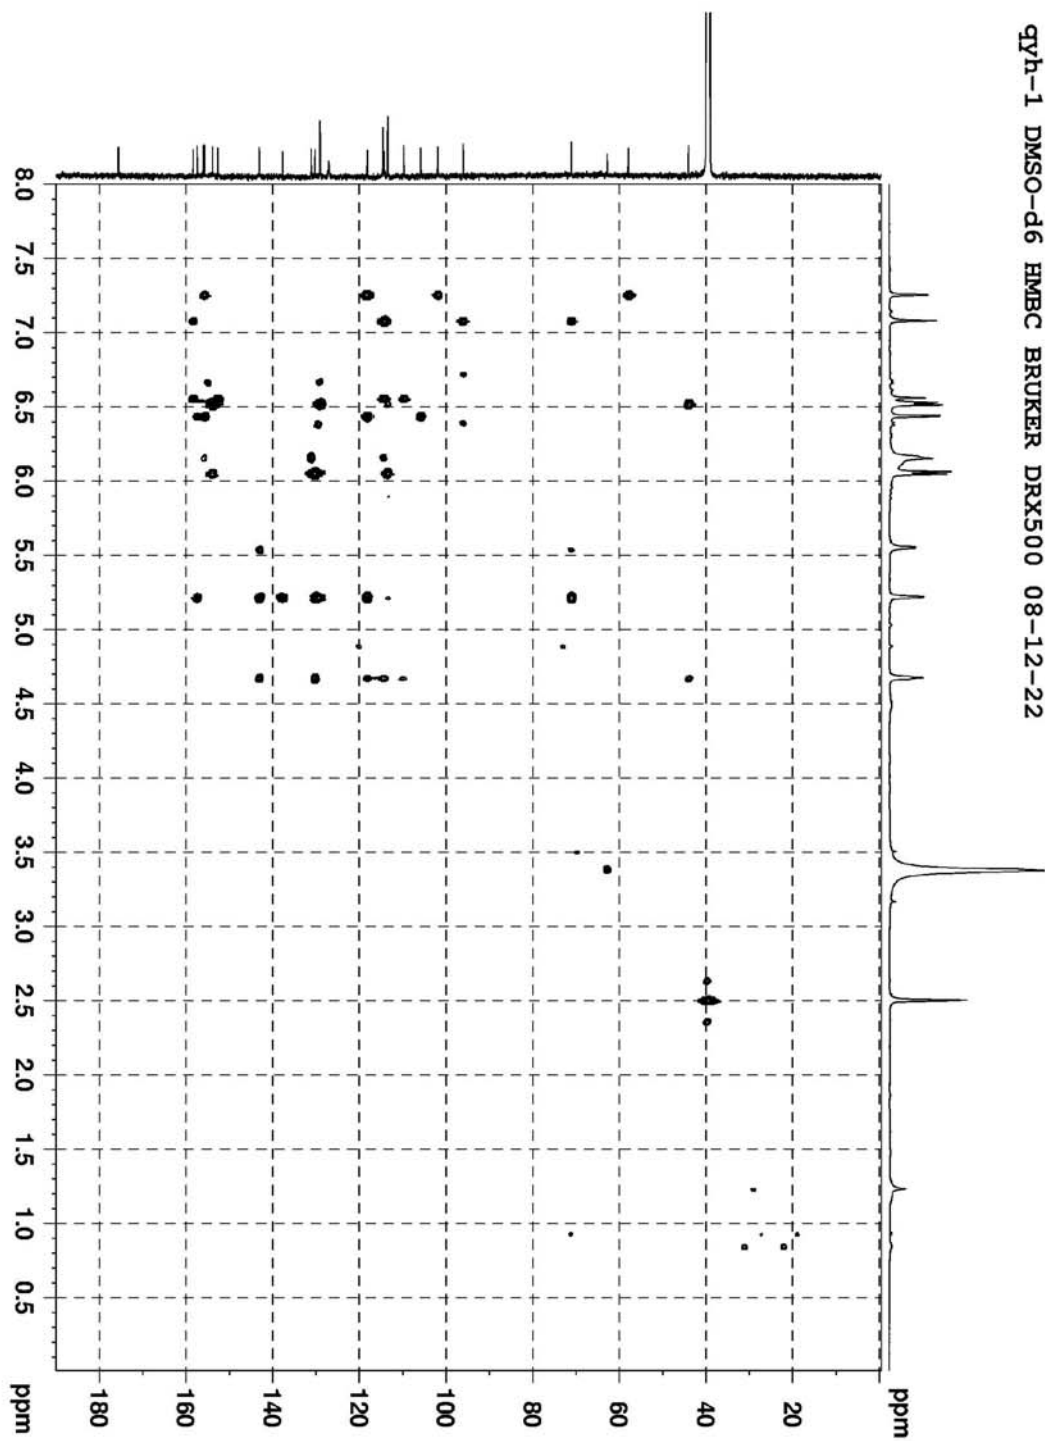

Figure S4 HMBC spectrum of compound **1** (DMSO-*d*<sub>6</sub>)

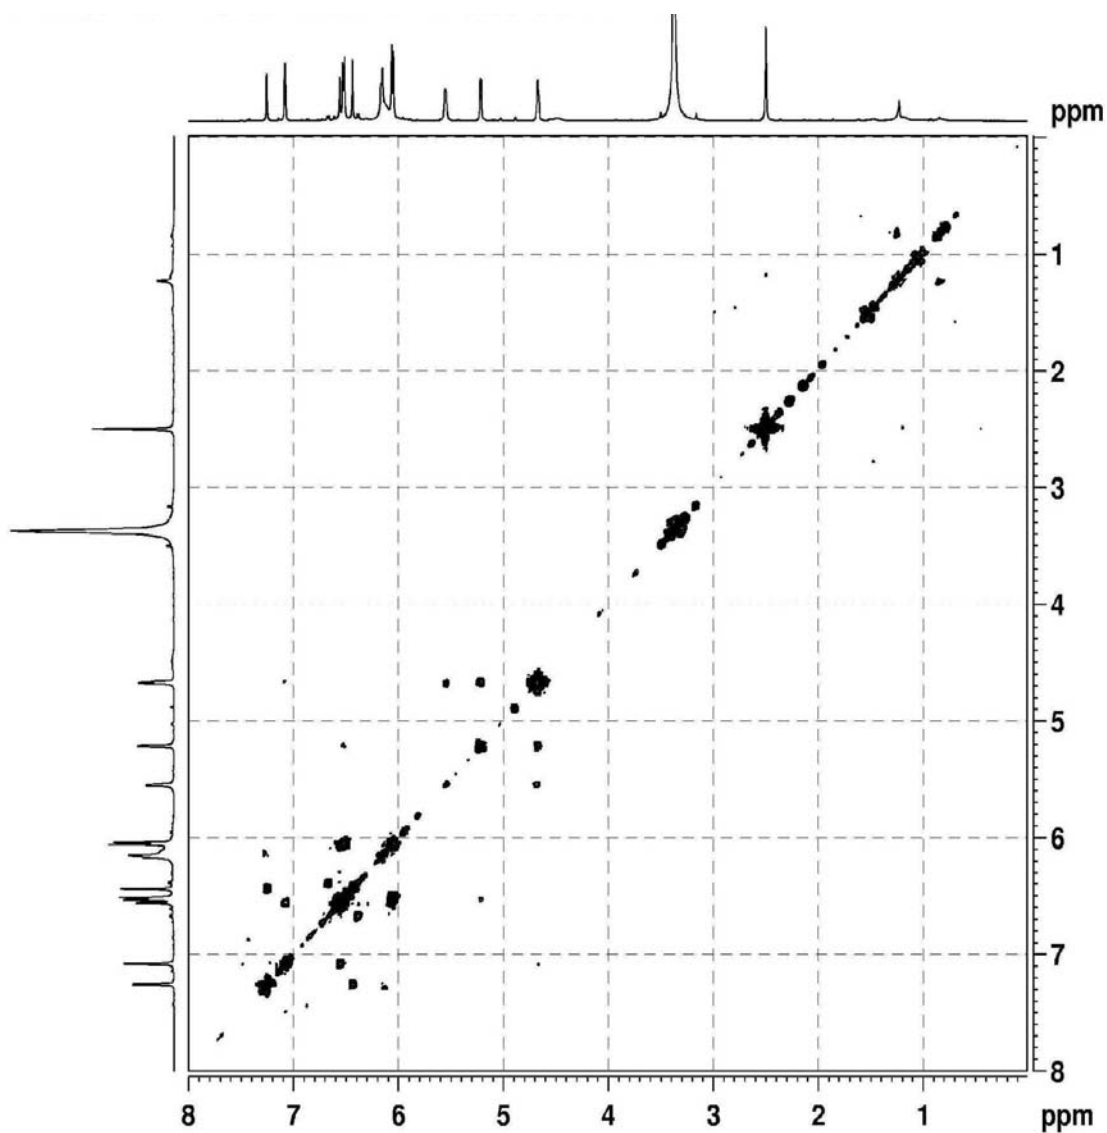

Figure S5  $^1\text{H}$ - $^1\text{H}$  COSY spectrum of compound **1** ( $\text{DMSO}-d_6$ )

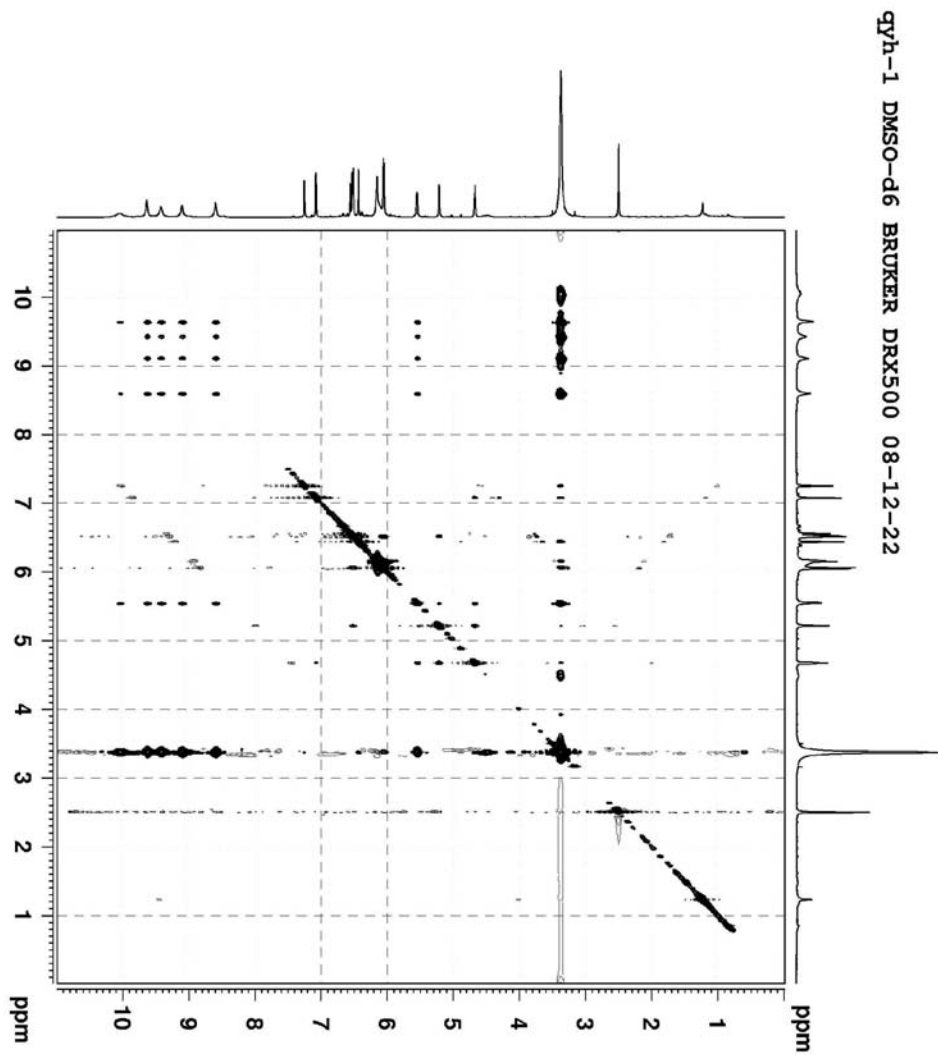

Figure S6 NOESY spectrum of compound **1** (DMSO- $d_6$ )



## Qualitative Analysis Report

|                        |              |                               |            |
|------------------------|--------------|-------------------------------|------------|
| <b>Data Filename</b>   | qyh-1p.d     | <b>Sample Name</b>            | qyh-1      |
| <b>Sample Type</b>     | Sample       | <b>Position</b>               | P1-D1      |
| <b>Instrument Name</b> | Instrument 1 | <b>User Name</b>              |            |
| <b>Acq Method</b>      | positive_2.m | <b>IRM Calibration Status</b> | XXXXXXXXXX |
| <b>DA Method</b>       | Default.m    | <b>Comment</b>                |            |

### User Spectra

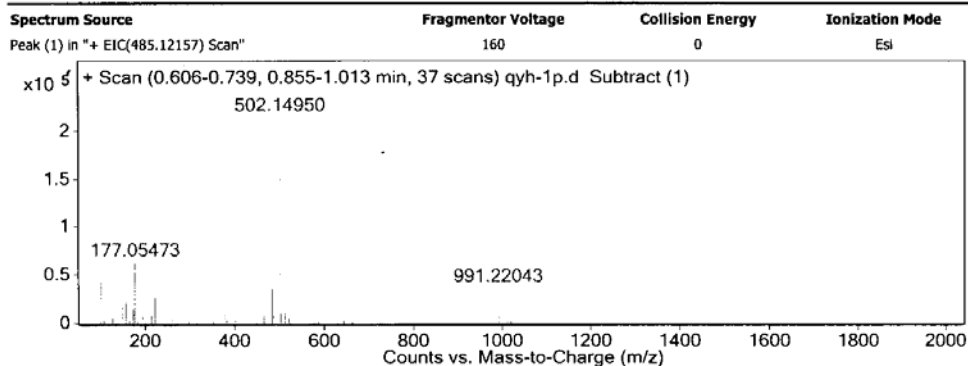

#### Peak List

| m/z       | z | Abund. | Formula                                        | Ion                |
|-----------|---|--------|------------------------------------------------|--------------------|
| 102.12795 |   | 42352  |                                                |                    |
| 149.02351 |   | 43355  |                                                |                    |
| 177.05473 |   | 64307  |                                                |                    |
| 223.09286 |   | 26539  |                                                |                    |
| 245.0785  |   | 23818  |                                                |                    |
| 485.12299 |   | 35487  | C <sub>28</sub> H <sub>21</sub> O <sub>8</sub> | (M+H) <sup>+</sup> |
| 502.1495  | 1 | 226394 |                                                |                    |
| 503.15258 | 1 | 62350  |                                                |                    |
| 507.10472 | 1 | 55020  |                                                |                    |
| 991.22043 | 1 | 36900  |                                                |                    |

--- End Of Report ---

Figure S7 HRESIMS spectrum of compound **1** (positive mode)

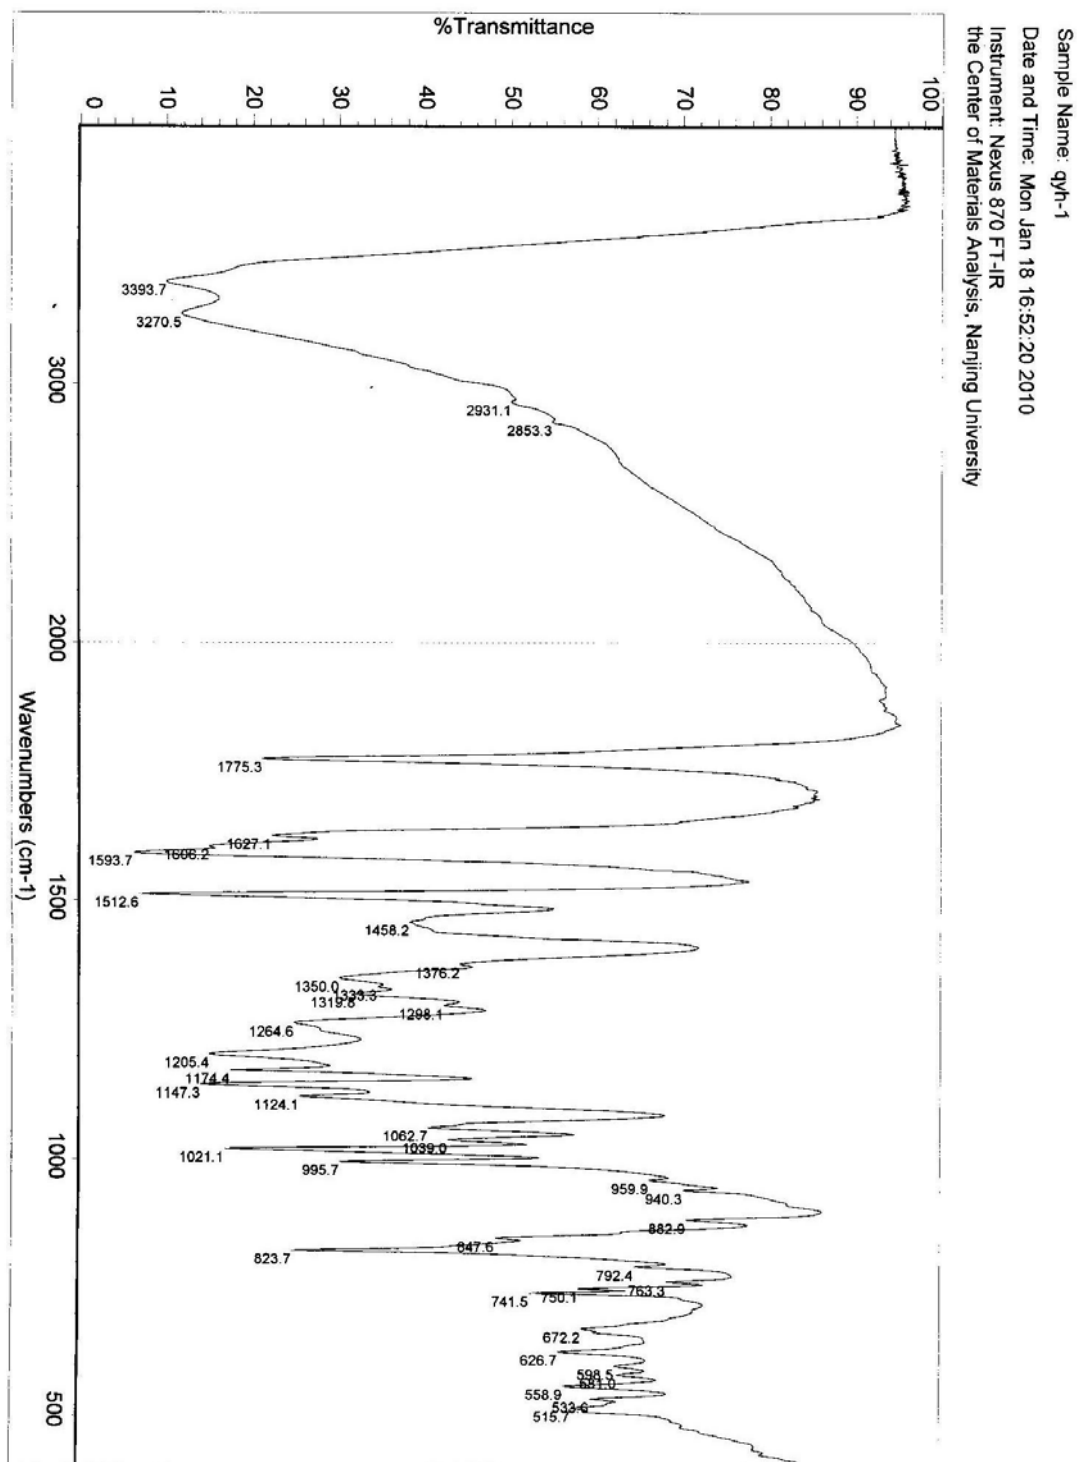

Figure S8 FT-IR spectrum of compound **1** (KBr)

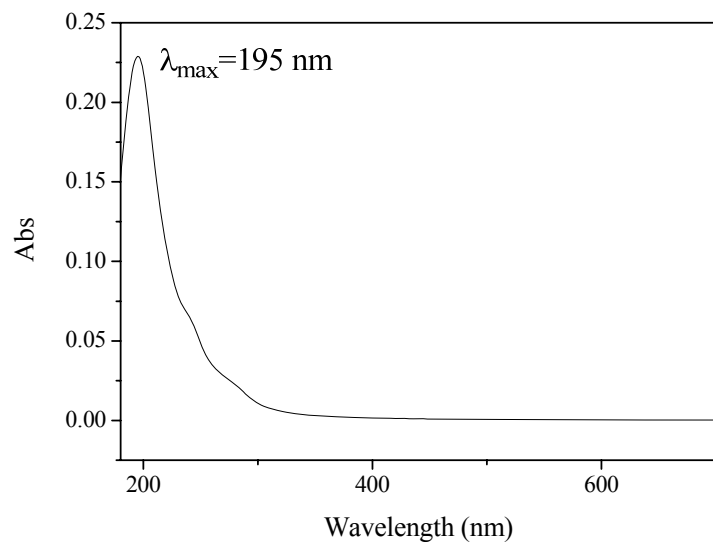

Figure S9 The theoretically predicted UV spectrum for **1**. The calculations are carried out at B3LYP/6-31G(d) level within the polarizable continuum model (CH<sub>3</sub>OH solvent: dielectric constant  $\epsilon = 32.63$ ).

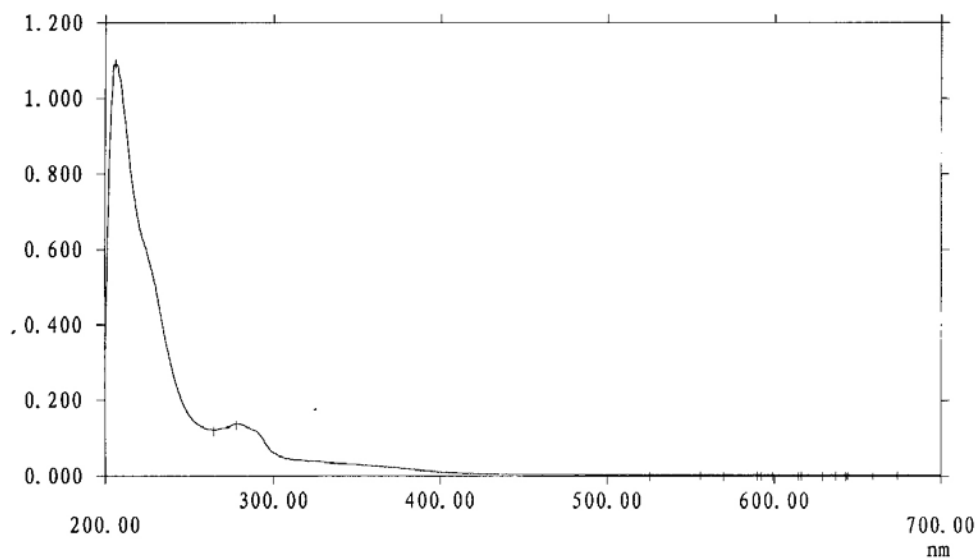

| No. | WL (nm) | Peak (Abs) | No. | WL (nm) | Valley (Abs) |
|-----|---------|------------|-----|---------|--------------|
| 1   | 673.50  | 0.004      | 1   | 658.50  | 0.003        |
| 2   | 643.50  | 0.004      | 2   | 642.50  | 0.003        |
| 3   | 636.50  | 0.004      | 3   | 628.50  | 0.003        |
| 4   | 616.00  | 0.004      | 4   | 614.00  | 0.003        |
| 5   | 598.50  | 0.004      | 5   | 592.00  | 0.003        |
| 6   | 589.50  | 0.004      | 6   | 569.50  | 0.003        |
| 7   | 556.00  | 0.004      | 7   | 525.50  | 0.003        |
| 8   | 277.50  | 0.137      | 8   | 264.00  | 0.121        |
| 9   | 206.00  | 1.096      |     |         |              |

Figure S10 UV spectrum of compound **1** (CH<sub>3</sub>OH)

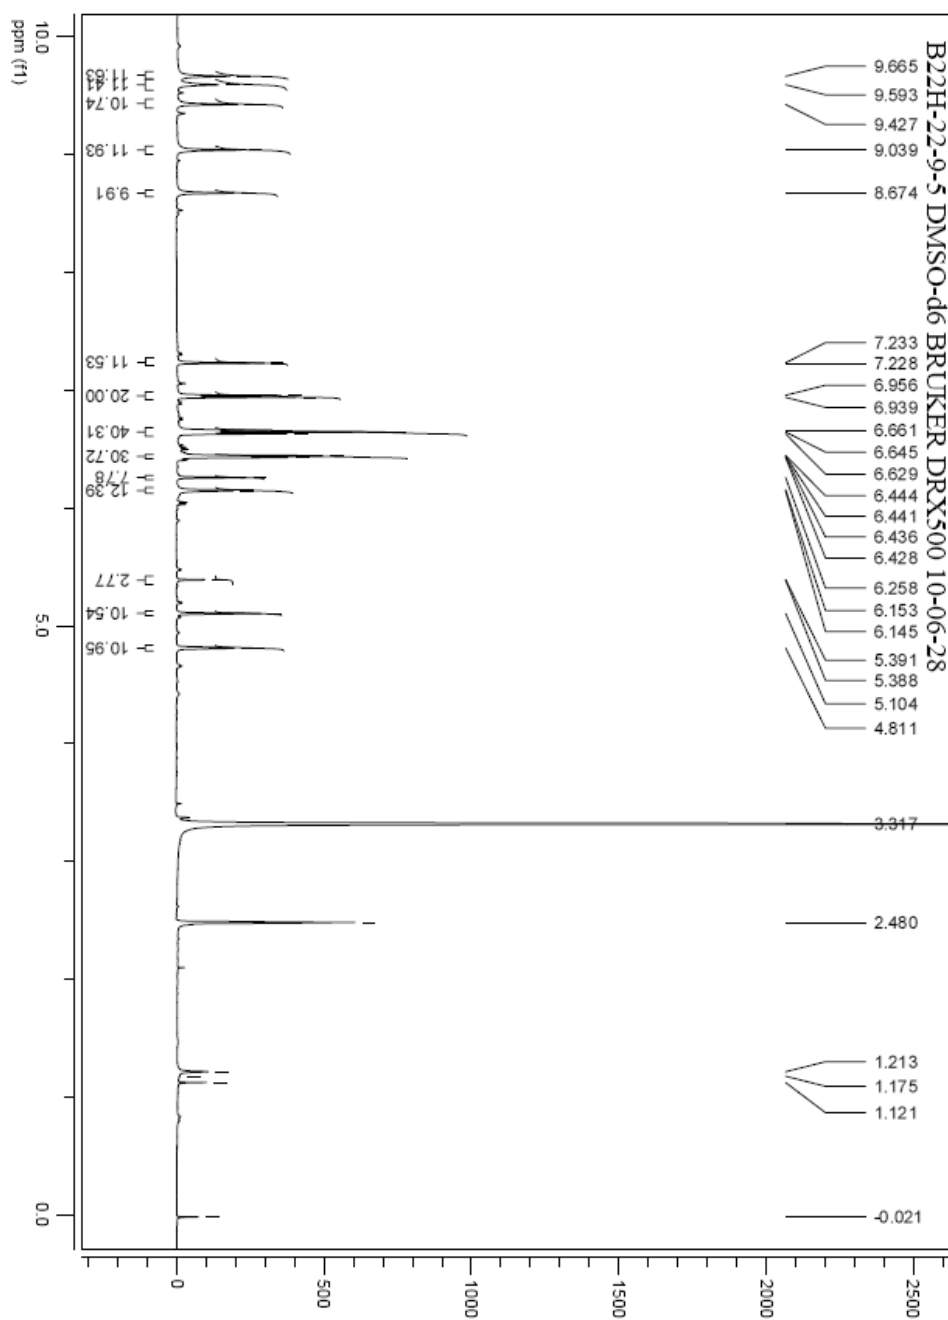

Figure S11  $^1\text{H}$ -NMR spectrum of compound **2** ( $\text{DMSO-}d_6$ )

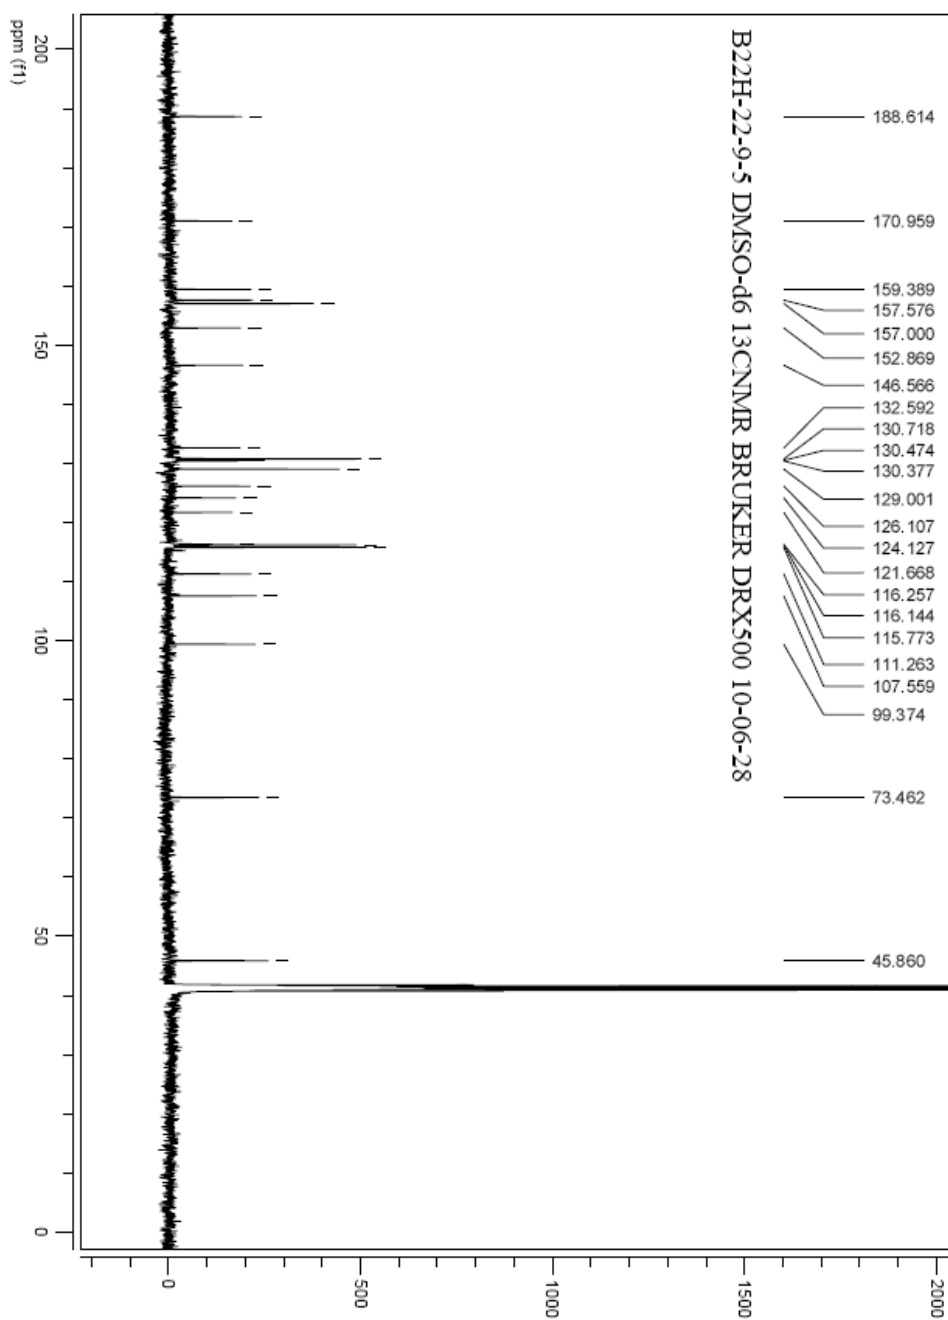

Figure S12  $^{13}\text{C}$ -NMR spectrum of compound **2** ( $\text{DMSO-}d_6$ )

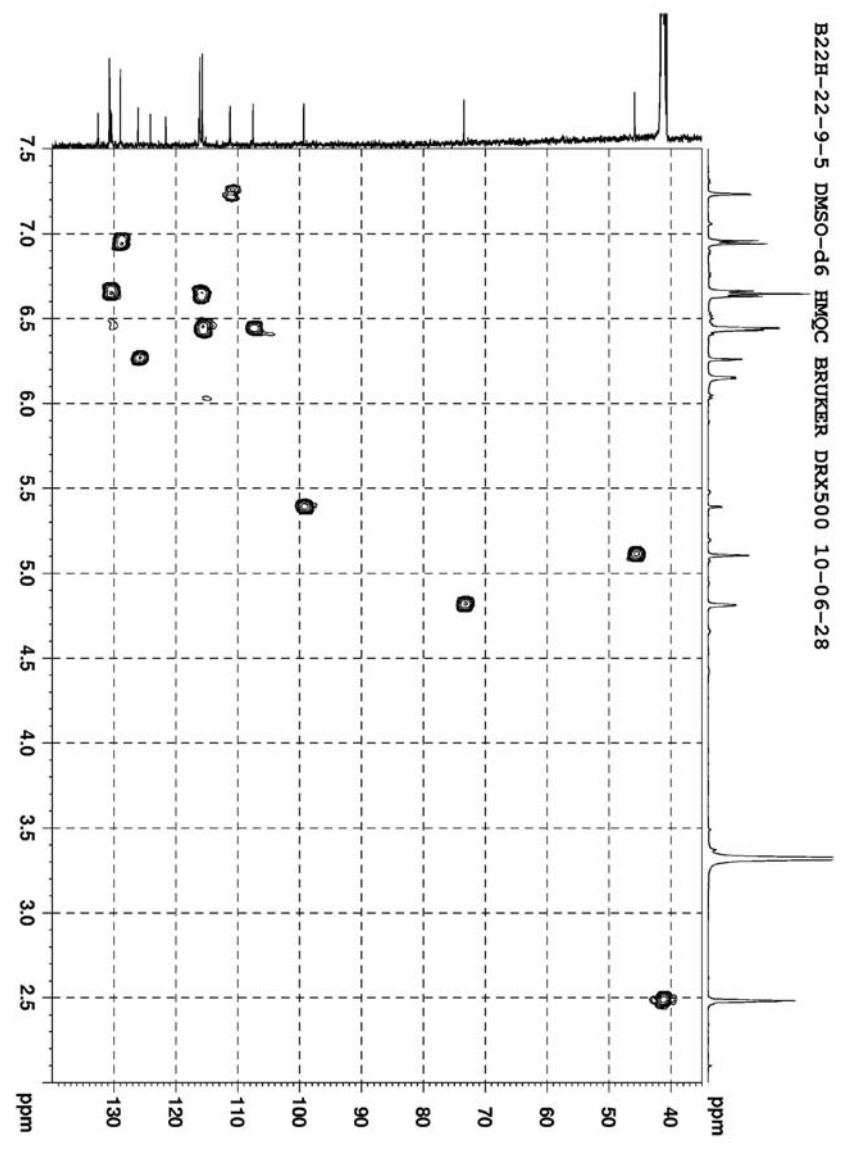

Figure S13 HMQC spectrum of compound **2** (DMSO-*d*<sub>6</sub>)

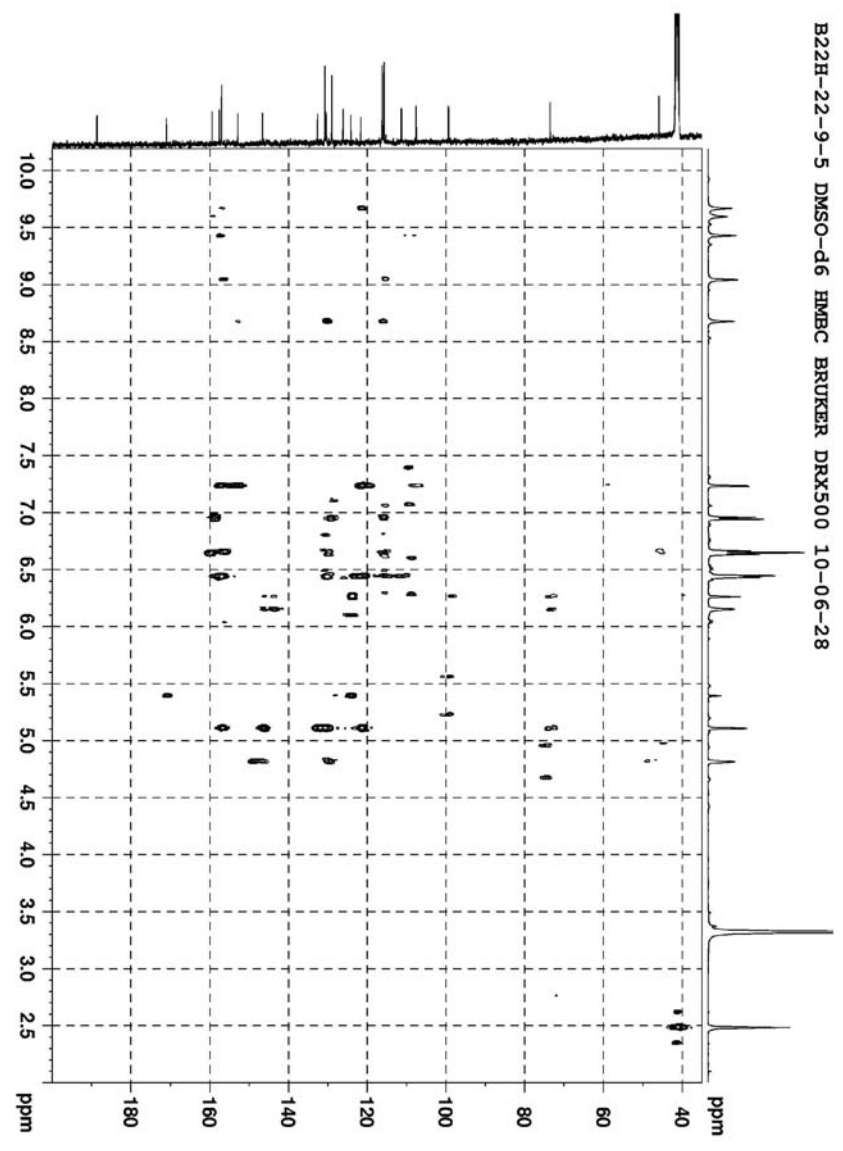

Figure S14 HMBC spectrum of compound 2 (DMSO-*d*<sub>6</sub>)



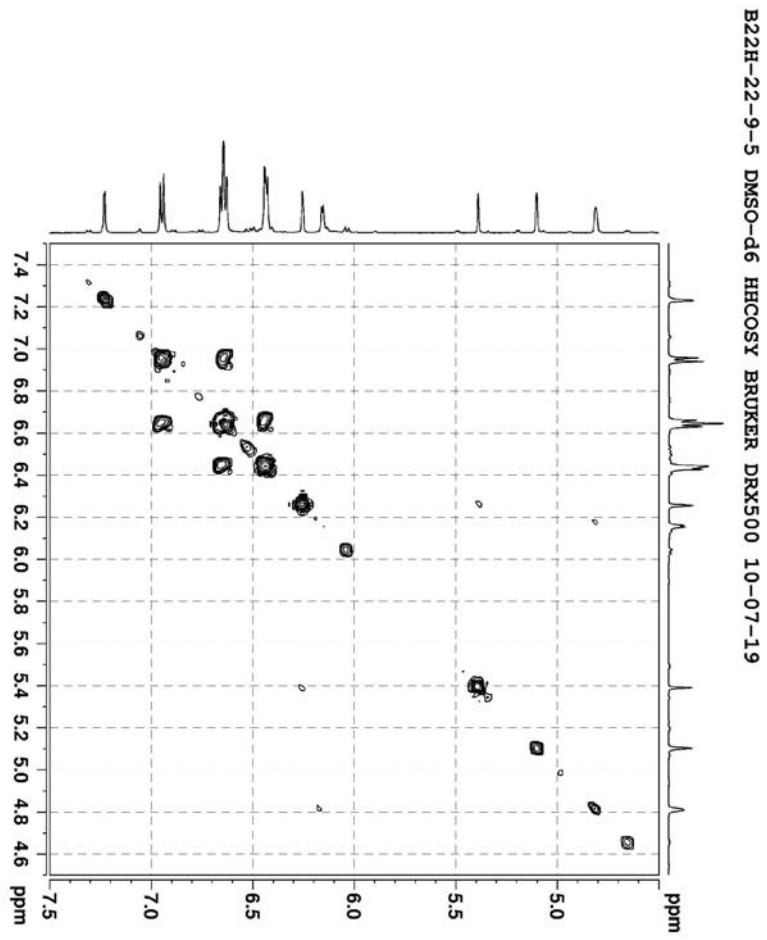

Figure S15 <sup>1</sup>H-<sup>1</sup>H COSY spectrum of compound 2 (DMSO-*d*<sub>6</sub>)

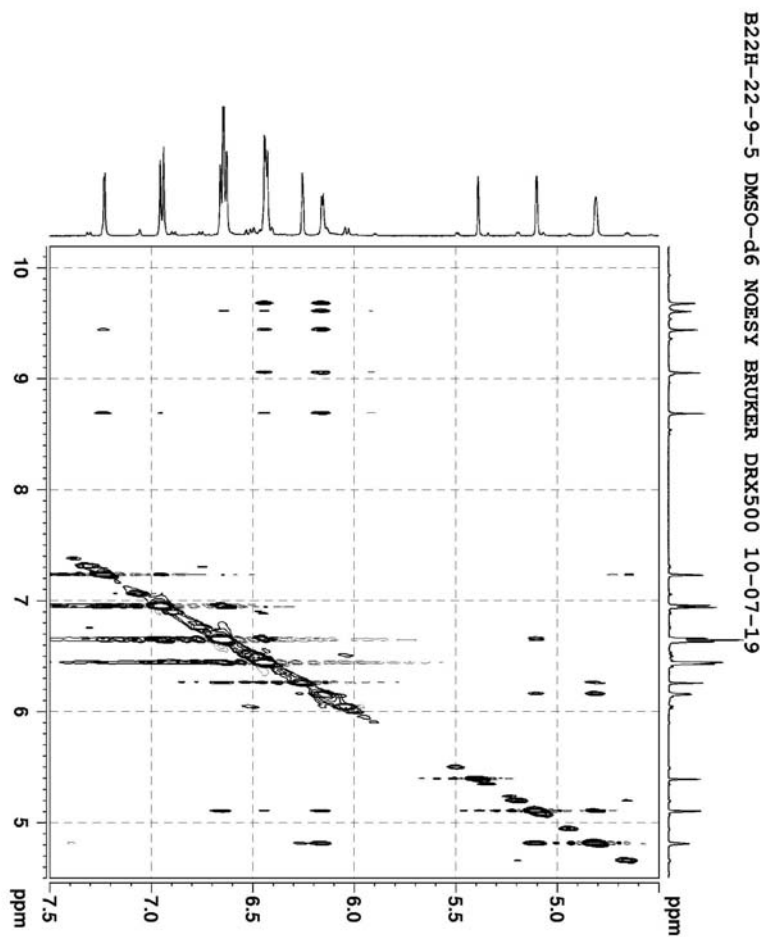

Figure S16 NOESY spectrum of compound **2** (DMSO- $d_6$ )

### Qualitative Analysis Report

|                               |                  |                      |                     |
|-------------------------------|------------------|----------------------|---------------------|
| <b>Data Filename</b>          | B22H-22-9-4.d    | <b>Sample Name</b>   | B22H-22-9-4         |
| <b>Sample Type</b>            | Sample           | <b>Position</b>      | P1-D5               |
| <b>Instrument Name</b>        | Instrument 1     | <b>User Name</b>     |                     |
| <b>Acq Method</b>             | TEMP2.m          | <b>Acquired Time</b> | 5/5/2010 6:48:07 PM |
| <b>IRM Calibration Status</b> | Some Ions Missed | <b>DA Method</b>     | Default.m           |
| <b>Comment</b>                |                  |                      |                     |

#### User Spectra

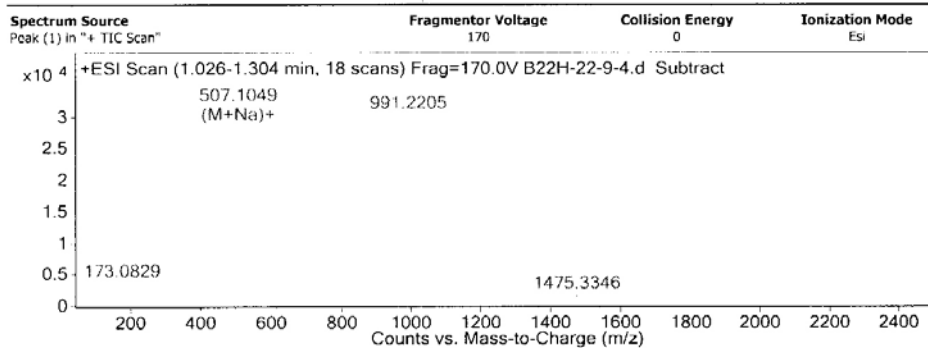

| Peak List |   |       |               |         |
|-----------|---|-------|---------------|---------|
| m/z       | z | Abund | Formula       | Ion     |
| 173.0829  |   | 3876  |               |         |
| 485.1232  | 1 | 15882 | C28 H21 O8    | (M+H)+  |
| 486.1264  | 1 | 4303  | C28 H21 O8    | (M+H)+  |
| 507.1049  | 1 | 33319 | C28 H20 Na O8 | (M+Na)+ |
| 508.1086  | 1 | 8317  | C28 H20 Na O8 | (M+Na)+ |
| 955.2047  | 1 | 8060  |               |         |
| 956.2079  | 1 | 3540  |               |         |
| 991.2205  | 1 | 30555 |               |         |
| 992.2241  | 1 | 16822 |               |         |
| 993.2264  | 1 | 5094  |               |         |

--- End Of Report ---

Figure S17 HRESIMS spectrum of compound **2** (positive mode)

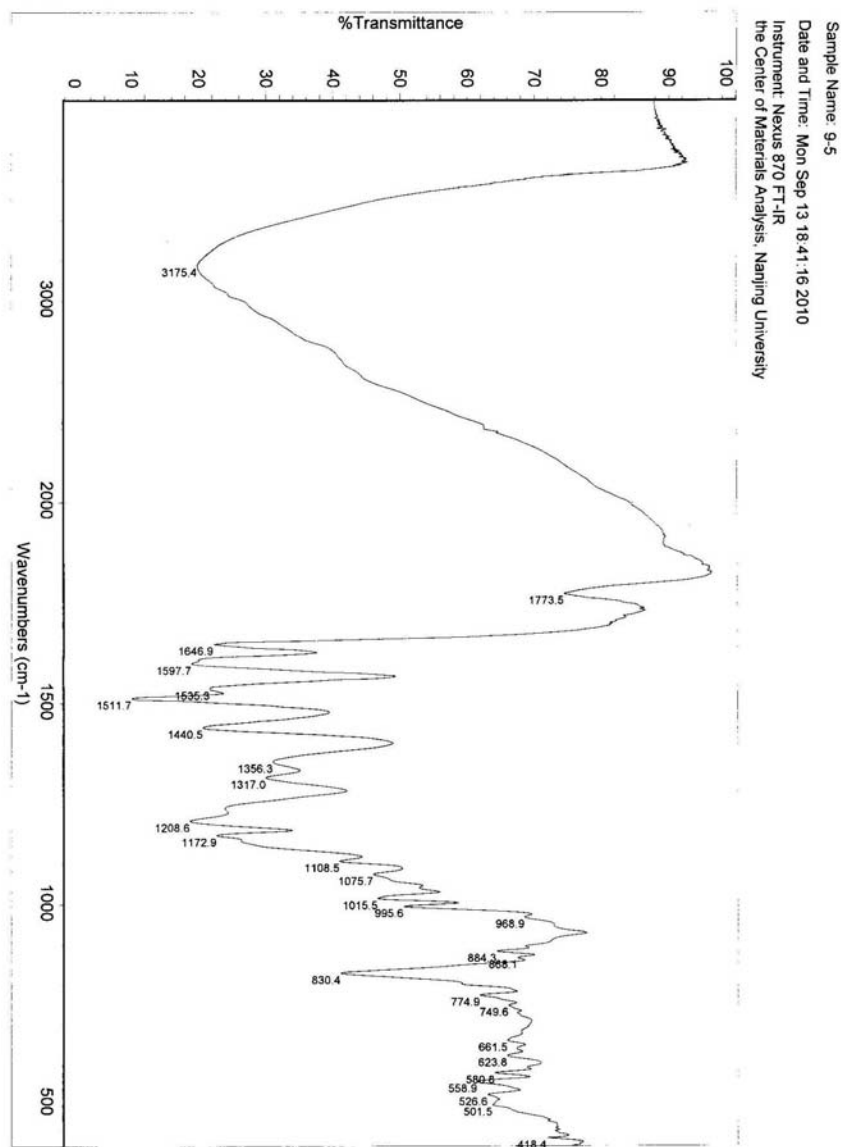

Figure S18 FT-IR spectrum of compound **2** (KBr)

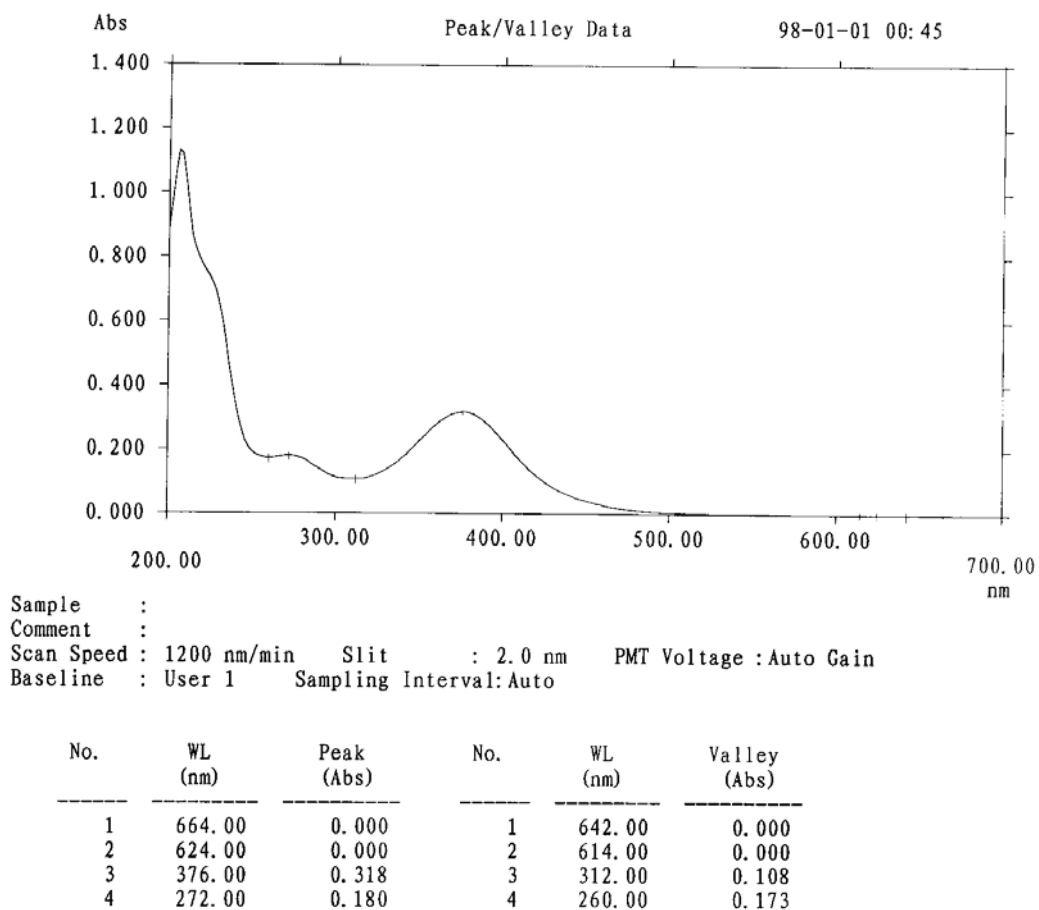

Figure S19 UV spectrum of compound 2 (CH<sub>3</sub>OH)

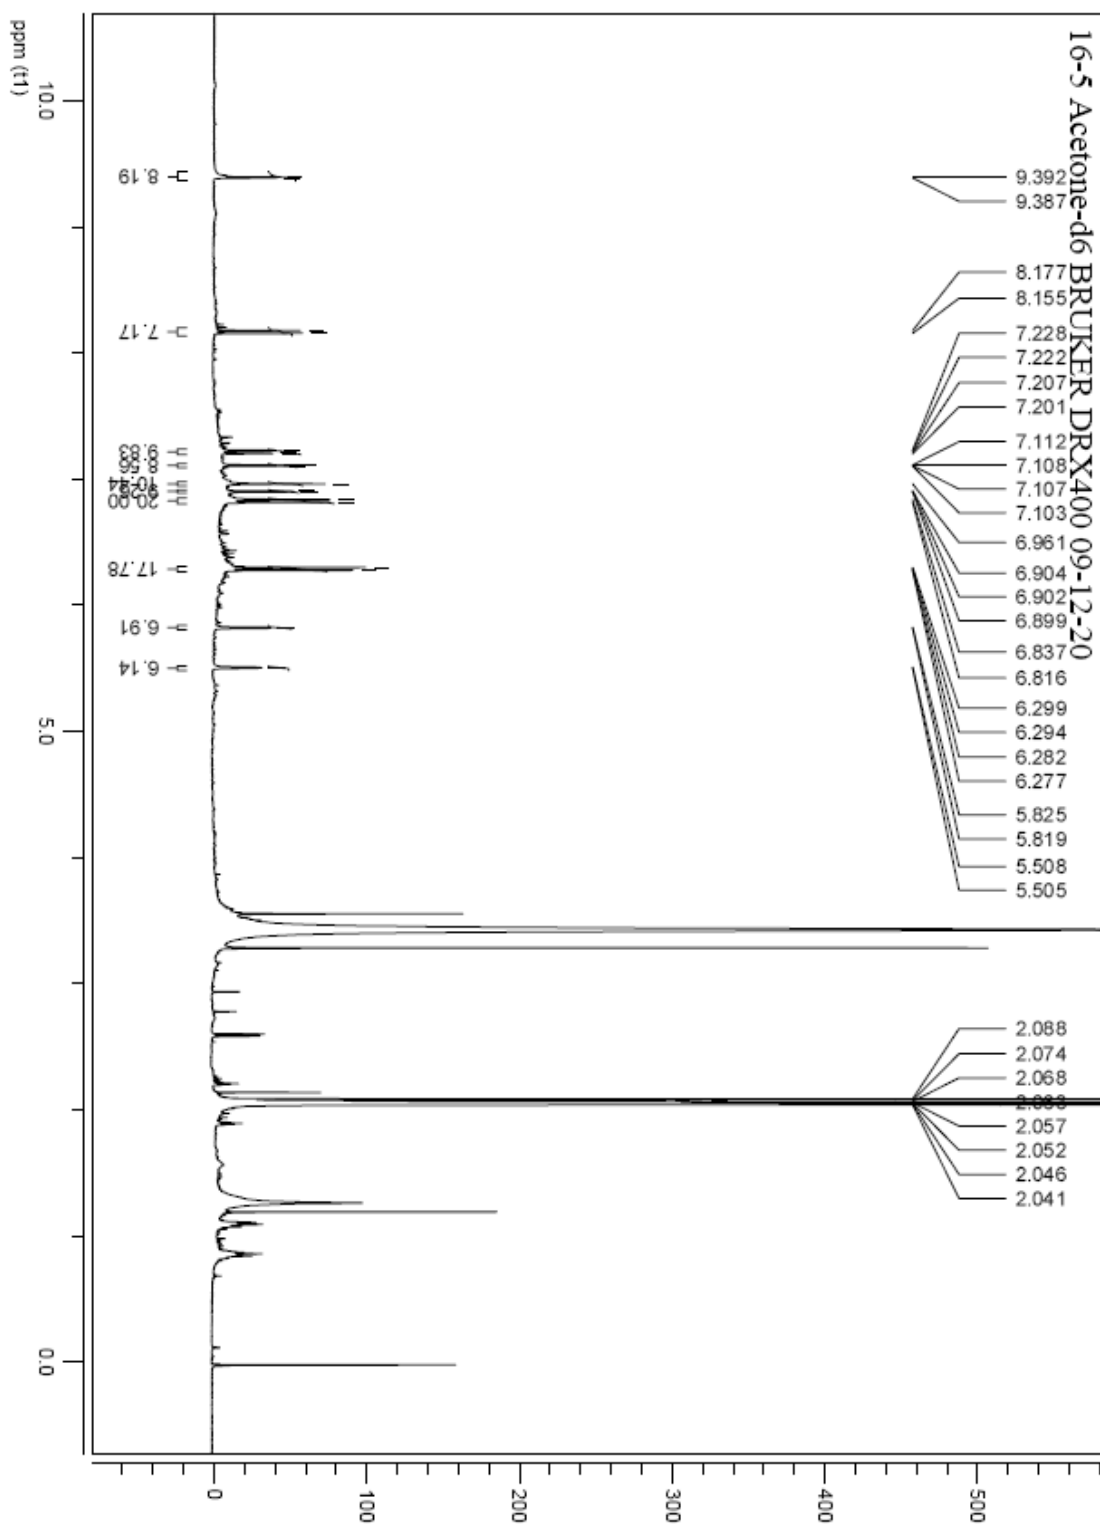

Figure S20  $^1\text{H-NMR}$  spectrum of compound **3** (acetone- $d_6$ )

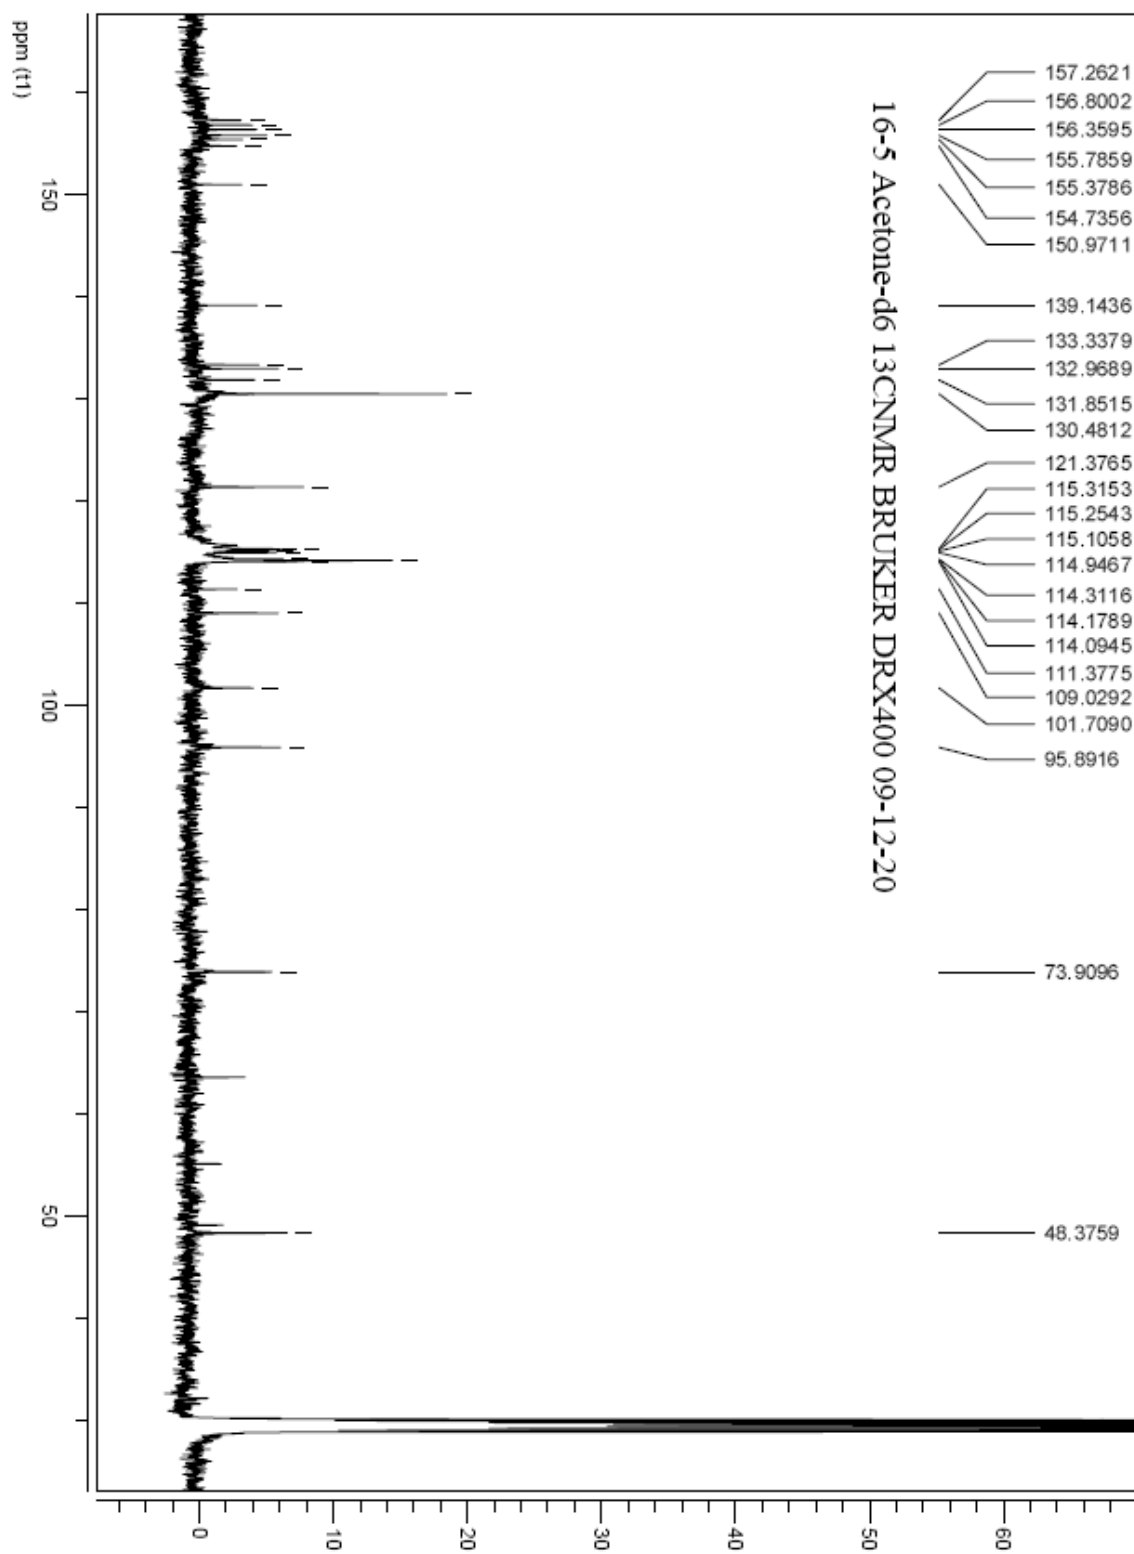

Figure S21  $^{13}\text{C}$ -NMR spectrum of compound **3** (acetone- $d_6$ )

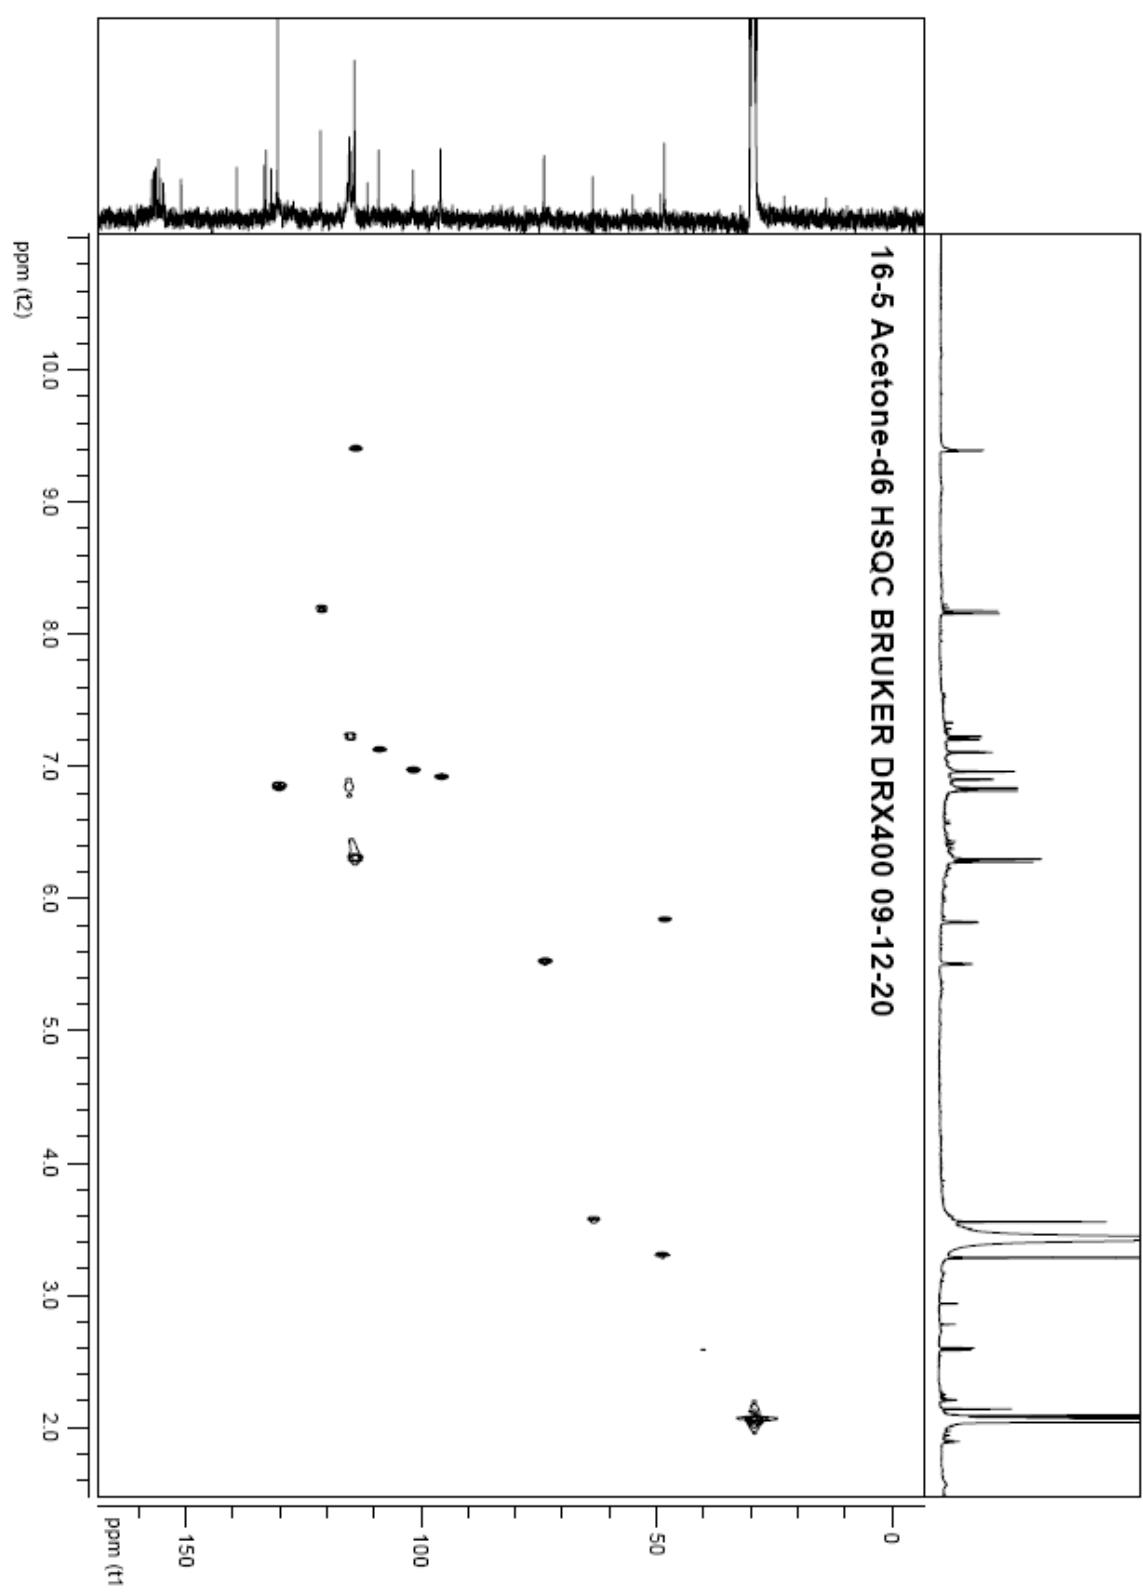

Figure S22 HSQC spectrum of compound **3** (acetone- $d_6$ )



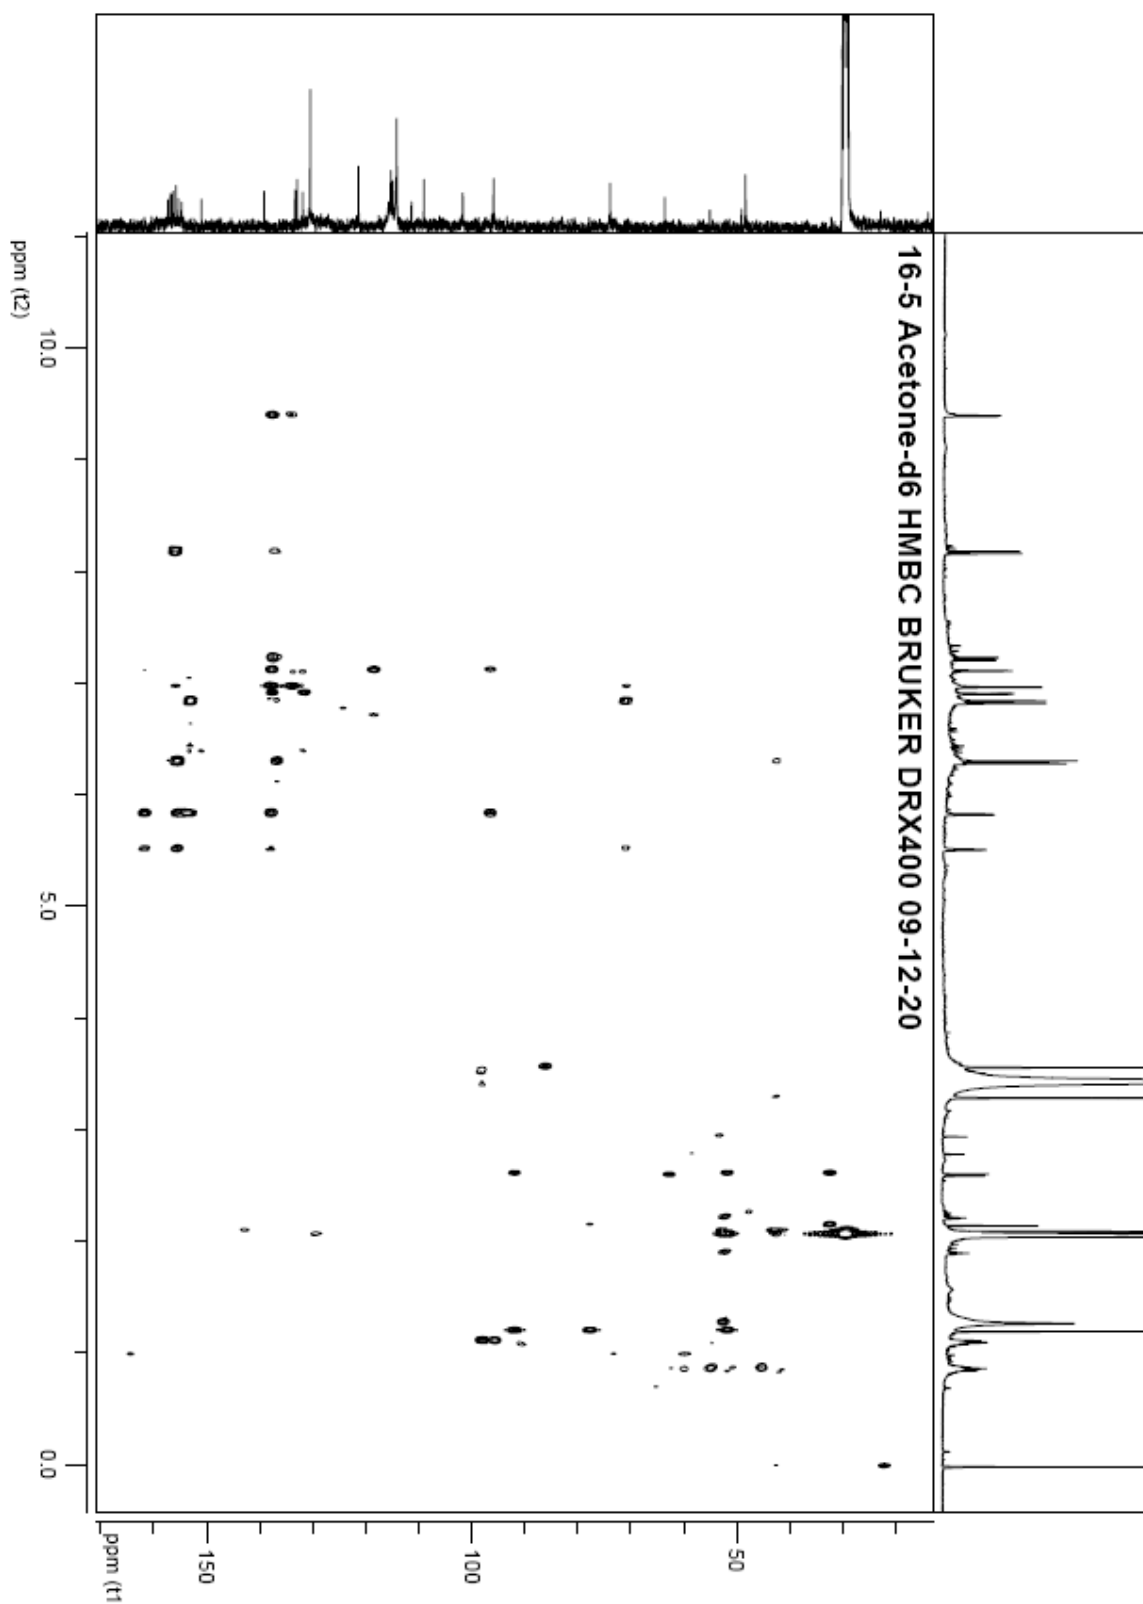

Figure S23 HMBC spectrum of compound **3** (acetone- $d_6$ )

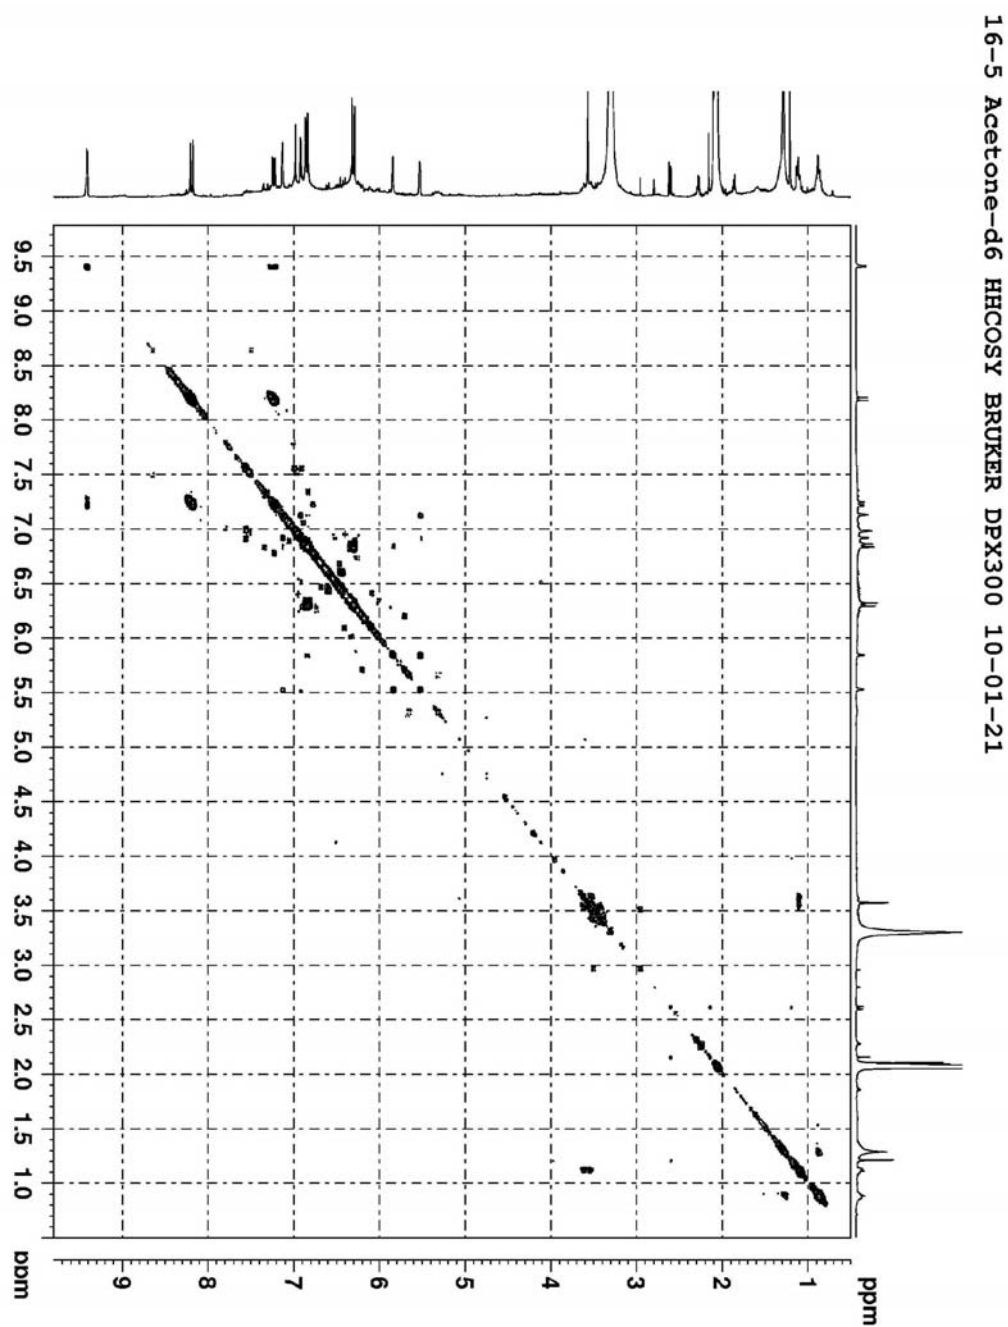

Figure S24  $^1\text{H}$ - $^1\text{H}$  COSY spectrum of compound **3** (acetone- $d_6$ )

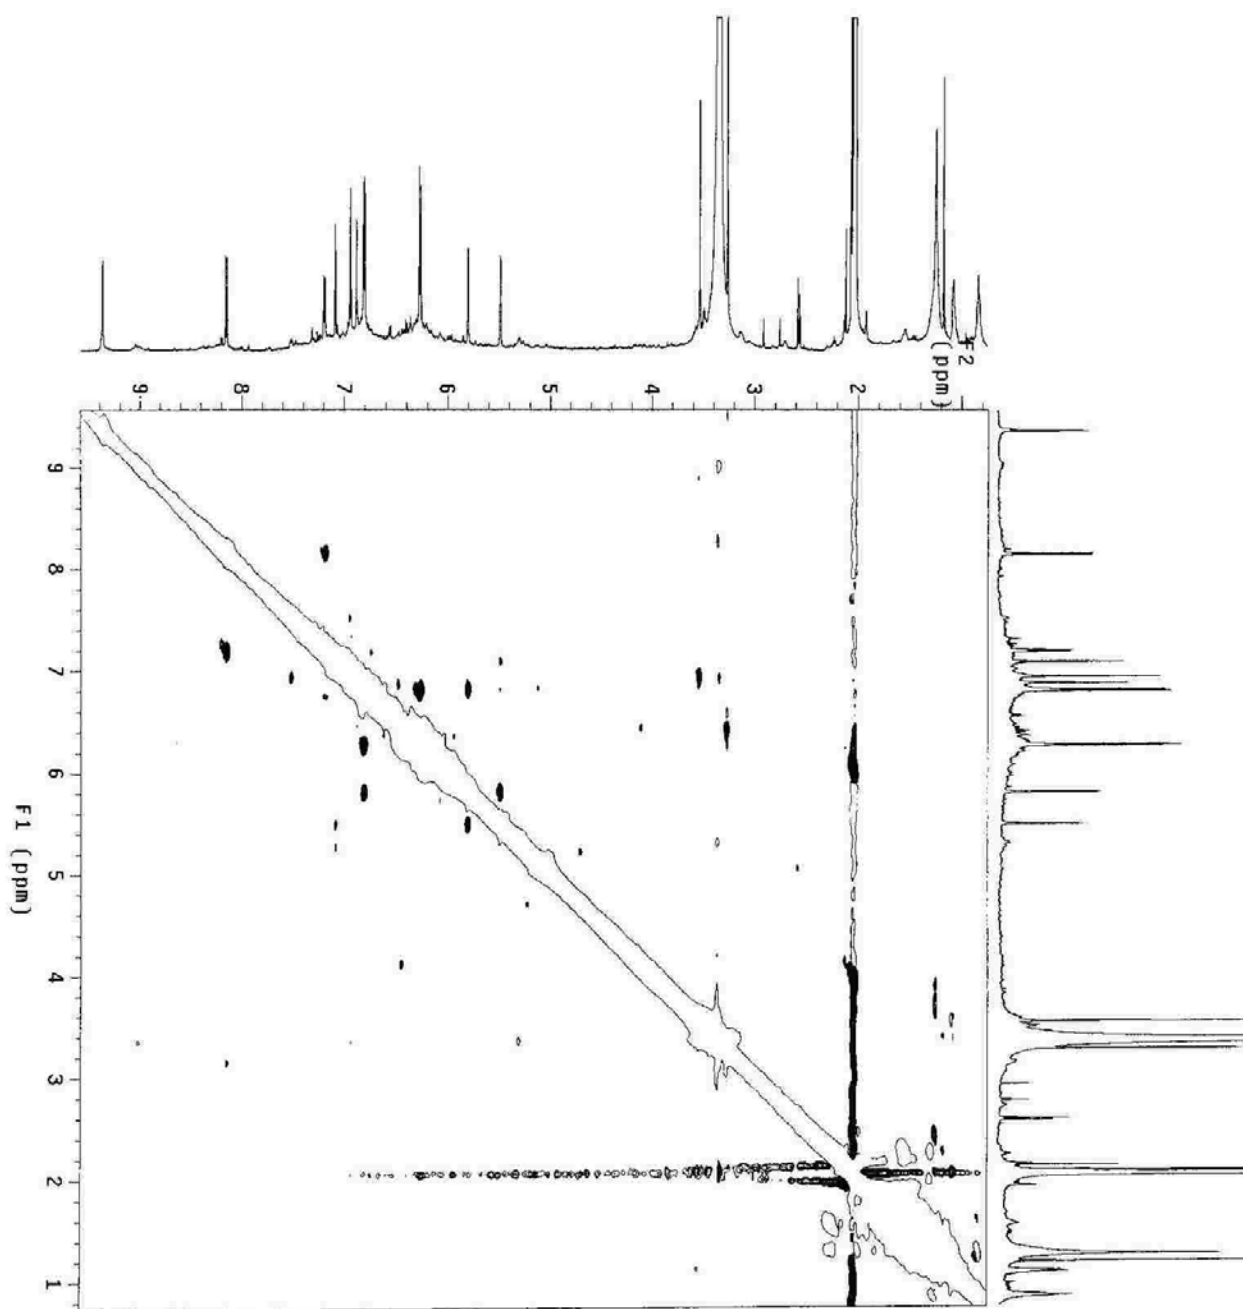

Figure S25 ROESY spectrum of compound **3** (acetone- $d_6$ )

## Qualitative Analysis Report

|                        |              |                               |          |
|------------------------|--------------|-------------------------------|----------|
| <b>Data Filename</b>   | qyh-3p.d     | <b>Sample Name</b>            | qyh-3    |
| <b>Sample Type</b>     | Sample       | <b>Position</b>               | P1-D3    |
| <b>Instrument Name</b> | Instrument 1 | <b>User Name</b>              |          |
| <b>Acq Method</b>      | positive.m   | <b>IRM Calibration Status</b> | SH/04/08 |
| <b>DA Method</b>       | Default.m    | <b>Comment</b>                |          |

### User Spectra

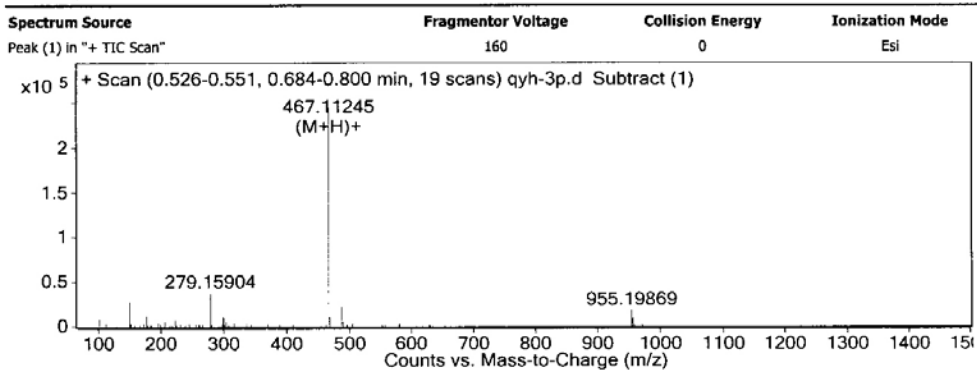

Peak List

| m/z       | z | Abund. | Formula                                        | Ion                |
|-----------|---|--------|------------------------------------------------|--------------------|
| 149.02341 |   | 27281  |                                                |                    |
| 279.15904 |   | 37659  |                                                |                    |
| 467.11245 | 1 | 244253 | C <sub>28</sub> H <sub>19</sub> O <sub>7</sub> | (M+H) <sup>+</sup> |
| 467.37867 |   | 15248  |                                                |                    |
| 468.1153  | 1 | 67709  | C <sub>28</sub> H <sub>19</sub> O <sub>7</sub> | (M+H) <sup>+</sup> |
| 489.09437 |   | 22240  |                                                |                    |
| 955.19869 |   | 17157  |                                                |                    |

--- End Of Report ---

Figure S26 HRESIMS spectrum of compound **3** (positive mode)

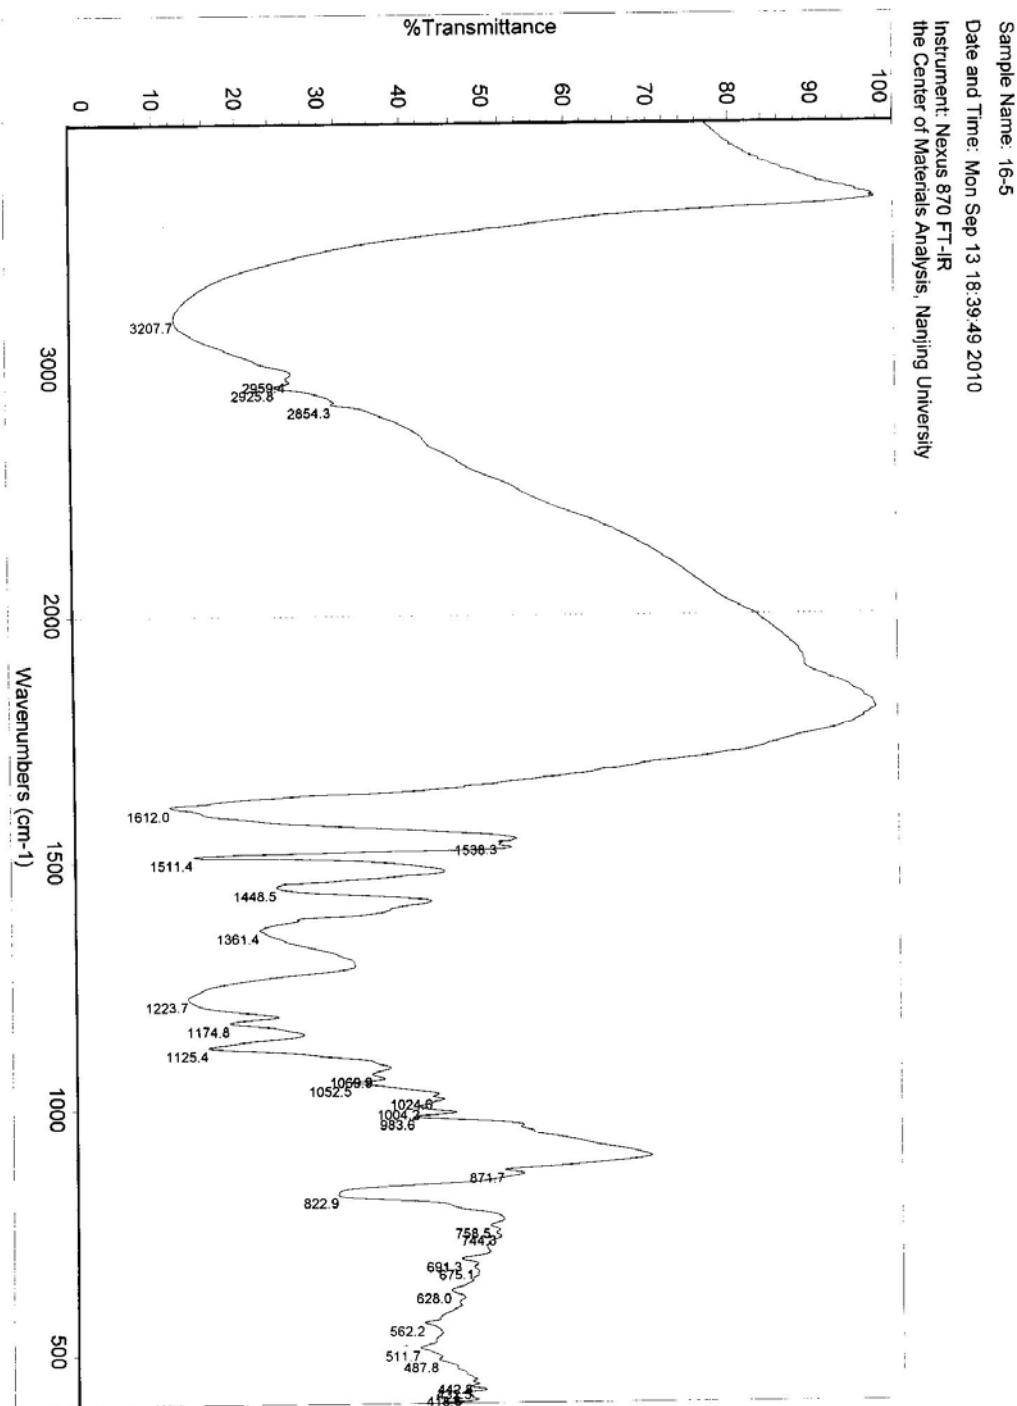

Figure S27 FT-IR spectrum of compound **3** (KBr)

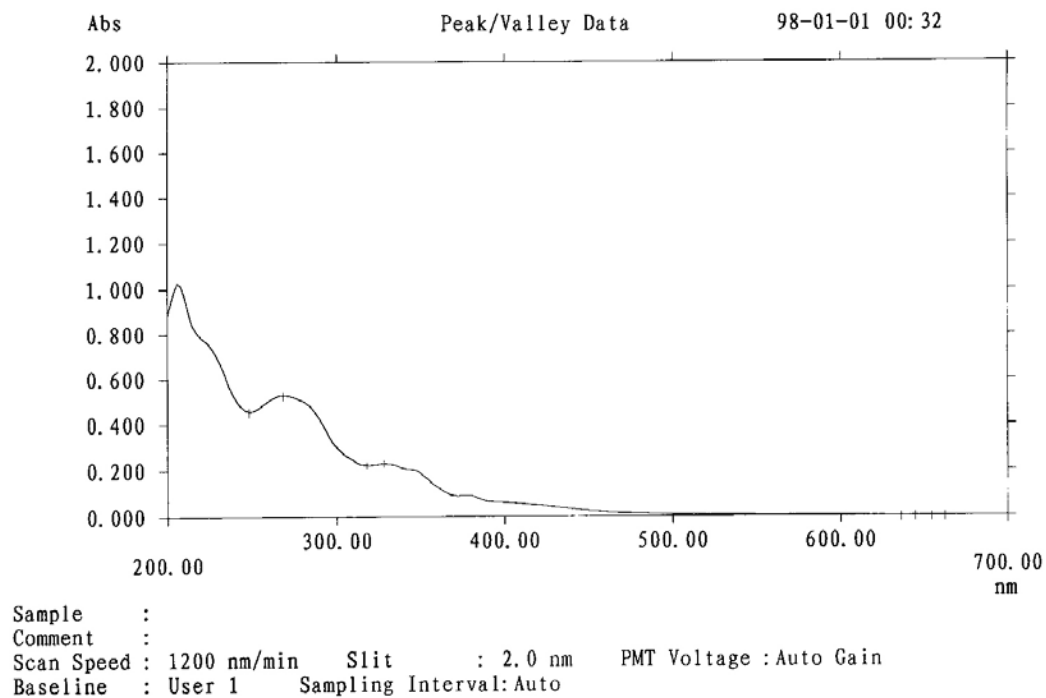

| No. | WL (nm) | Peak (Abs) | No. | WL (nm) | Valley (Abs) |
|-----|---------|------------|-----|---------|--------------|
| 1   | 662.00  | 0.001      | 1   | 654.00  | 0.001        |
| 2   | 644.00  | 0.001      | 2   | 636.00  | 0.001        |
| 3   | 328.00  | 0.229      | 3   | 318.00  | 0.222        |
| 4   | 268.00  | 0.530      | 4   | 248.00  | 0.457        |

Figure S28 UV spectrum of compound **3** (CH<sub>3</sub>OH)

Table S1 The optimized structural information for **1** within polarizable continuum model (CH<sub>3</sub>OH solvent: dielectric constant  $\epsilon = 32.63$ ) at B3LYP/6-31G(d) level.

| Atoms | Coordinate X | Coordinate Y | Coordinate Z |
|-------|--------------|--------------|--------------|
| C     | 0.535        | -0.801       | 1.099        |
| C     | -0.688       | -0.243       | 1.546        |
| C     | -1.103       | -0.357       | 2.874        |
| C     | -0.313       | -1.054       | 3.790        |
| C     | 0.871        | -1.651       | 3.374        |
| C     | 1.280        | -1.537       | 2.039        |
| H     | -2.024       | 0.090        | 3.222        |
| H     | 1.480        | -2.221       | 4.076        |
| C     | -3.313       | -2.085       | -2.505       |
| C     | -1.921       | -2.145       | -2.382       |
| C     | -4.070       | -1.269       | -1.653       |
| C     | -1.230       | -1.390       | -1.421       |
| H     | -1.381       | -2.795       | -3.067       |
| C     | -3.359       | -0.519       | -0.733       |
| H     | -5.154       | -1.225       | -1.697       |
| C     | -1.970       | -0.523       | -0.609       |
| C     | -1.595       | 0.442        | 0.507        |
| C     | -3.010       | 0.815        | 1.041        |
| C     | 0.273        | -1.623       | -1.296       |
| H     | 0.712        | -1.502       | -2.300       |
| C     | 0.977        | -0.624       | -0.359       |
| H     | 0.590        | 0.349        | -0.672       |
| C     | 2.482        | -0.506       | -0.607       |
| C     | 3.119        | 0.696        | -0.278       |
| C     | 3.254        | -1.512       | -1.207       |
| C     | 4.477        | 0.895        | -0.527       |
| H     | 2.543        | 1.499        | 0.177        |
| C     | 4.608        | -1.324       | -1.472       |
| H     | 2.793        | -2.464       | -1.445       |
| C     | 5.226        | -0.118       | -1.130       |
| H     | 4.948        | 1.841        | -0.265       |
| H     | 5.201        | -2.106       | -1.937       |
| O     | 0.529        | -2.950       | -0.824       |
| H     | -0.089       | -3.550       | -1.270       |
| O     | -3.887       | -2.857       | -3.473       |
| H     | -4.847       | -2.724       | -3.461       |
| O     | -3.977       | 0.290        | 0.199        |
| O     | -3.315       | 1.505        | 1.972        |
| C     | -1.044       | 1.811        | 0.029        |
| C     | -0.448       | 2.675        | 0.956        |
| C     | -1.215       | 2.264        | -1.287       |
| C     | -0.012       | 3.942        | 0.577        |
| H     | -0.327       | 2.357        | 1.986        |
| C     | -0.783       | 3.529        | -1.677       |
| H     | -1.683       | 1.619        | -2.024       |

|   |        |        |        |
|---|--------|--------|--------|
| C | -0.177 | 4.375  | -0.744 |
| H | 0.451  | 4.598  | 1.312  |
| H | -0.908 | 3.874  | -2.698 |
| O | 0.231  | 5.605  | -1.176 |
| H | 0.614  | 6.091  | -0.429 |
| O | -0.764 | -1.126 | 5.079  |
| H | -0.133 | -1.639 | 5.607  |
| O | 2.425  | -2.150 | 1.629  |
| H | 2.829  | -2.603 | 2.385  |
| O | 6.562  | 0.014  | -1.411 |
| H | 6.852  | 0.896  | -1.130 |



Table S2 TDDFT results for the optimized conformer of (7bS)-1 (200nm< $\lambda$ <400nm). The TDDFT calculations are done at the level of B3LYP/6-31G(d) in the polarizable continuum model (CH<sub>3</sub>OH solvent: dielectric constant  $\epsilon = 32.63$ ).

| Transition | Excitation energy <sup>a</sup><br>(nm) | Rotatory Strength<br>$R^b$<br>(10 <sup>-40</sup> cgs) | Oscillator Strength<br>$f^b$ | Dominant Contributions <sup>c</sup> | Weight       |
|------------|----------------------------------------|-------------------------------------------------------|------------------------------|-------------------------------------|--------------|
| 4          | 283.33                                 | 30.1915                                               | 0.0550                       | 124 → 127                           | 0.44         |
| 5          | 281.26                                 | 36.4259                                               | 0.0259                       | 123 → 127                           | 0.46         |
| 7          | 273.28                                 | 1.5034                                                | 0.0621                       | 126 → 129                           | 0.26         |
| 10         | 264.87                                 | -47.8648                                              | 0.0117                       | 122 → 127                           | 0.34         |
| 11         | 263.73                                 | -20.6052                                              | 0.0078                       | 125 → 129                           | 0.32         |
| 12         | 261.37                                 | 52.7662                                               | 0.0296                       | 124 → 128                           | 0.24         |
| 16         | 249.32                                 | 21.2609                                               | 0.0362                       | 126 → 132                           | 0.24         |
| 18         | 247.56                                 | 15.7061                                               | 0.0346                       | 122 → 128                           | 0.15         |
| 19         | 245.65                                 | 26.7606                                               | 0.0456                       | 123 → 129                           | 0.30         |
| 21         | 243.29                                 | -16.5655                                              | 0.0549                       | 123 → 130                           | 0.29         |
| 22         | 242.34                                 | 22.7906                                               | 0.0298                       | 121 → 127                           | 0.30         |
| 23         | 240.22                                 | 76.2092                                               | 0.0673                       | 120 → 127                           | 0.42         |
| 25         | 235.92                                 | -40.3156                                              | 0.0327                       | 119 → 127                           | 0.24         |
| 26         | 235.41                                 | -27.1127                                              | 0.0517                       | 126 → 134                           | 0.10         |
| 31         | 229.47                                 | 17.2238                                               | 0.0408                       | 122 → 130                           | 0.26         |
| 32         | 228.41                                 | 31.0249                                               | 0.0111                       | 117 → 127                           | 0.48         |
| 36         | 225.01                                 | 19.4478                                               | 0.0132                       | 124 → 132                           | 0.20         |
| 45         | 216.58                                 | 20.9542                                               | 0.1103                       | 120 → 129<br>126 → 132              | 0.12<br>0.14 |
| 46         | 216.11                                 | 22.7801                                               | 0.0669                       | 120 → 129<br>123 → 133              | 0.13<br>0.10 |
| 48         | 215.11                                 | -37.8064                                              | 0.0617                       | 125 → 135                           | 0.24         |
| 51         | 212.27                                 | -27.5234                                              | 0.0398                       | 120 → 130<br>123 → 134              | 0.10<br>0.23 |
| 52         | 210.14                                 | 95.6042                                               | 0.2251                       | 122 → 132                           | 0.15         |
| 53         | 208.12                                 | -32.6942                                              | 0.0157                       | 119 → 130<br>124 → 135              | 0.17<br>0.17 |
| 55         | 206.53                                 | 30.5997                                               | 0.0228                       | 119 → 129<br>124 → 135              | 0.11<br>0.11 |
| 56         | 205.11                                 | -159.092                                              | 0.1134                       | 121 → 132<br>122 → 133              | 0.10<br>0.10 |
| 57         | 204.88                                 | -220.727                                              | 0.1386                       | 123 → 134                           | 0.09         |
| 58         | 204.63                                 | -31.5183                                              | 0.0487                       | 121 → 132<br>123 → 135              | 0.12<br>0.13 |
| 60         | 202.45                                 | -72.4806                                              | 0.1782                       | 120 → 131<br>122 → 134              | 0.13<br>0.09 |
| 61         | 202.00                                 | 228.1845                                              | 0.2204                       | 122 → 134                           | 0.19         |
| 62         | 201.12                                 | 236.9758                                              | 0.3268                       | 120 → 132                           | 0.19         |
| 63         | 200.06                                 | 36.0665                                               | 0.0614                       | 116 → 127                           | 0.39         |

<sup>a</sup> Excited states with  $f < 0.1$  and  $R < \pm 16.0$  were not presented. All the excitation energies are shifted 11 nm according to the UV correction.

<sup>b</sup> All the strengths were in the velocity representation.

<sup>c</sup> Configurations with weights below 0.10 were not displayed.

Table S3. The Cartesian coordinates of the optimized structure for **2** within PCM model (CH<sub>3</sub>OH solvent: dielectric constant  $\epsilon=32.63$ ) at B3LYP/6-31G(d) level.

| Atom | X      | Y      | Z      |
|------|--------|--------|--------|
| C    | -1.250 | 0.628  | -0.748 |
| C    | 1.614  | 0.324  | -0.049 |
| C    | 1.711  | 1.792  | -0.550 |
| H    | 0.906  | 0.358  | 0.789  |
| H    | 2.503  | 2.299  | 0.017  |
| O    | 2.048  | 1.772  | -1.938 |
| H    | 2.074  | 2.694  | -2.241 |
| C    | 2.920  | -0.164 | 0.575  |
| C    | 2.872  | -1.034 | 1.667  |
| C    | 4.180  | 0.273  | 0.141  |
| C    | 4.035  | -1.469 | 2.306  |
| H    | 1.909  | -1.384 | 2.033  |
| C    | 5.348  | -0.142 | 0.771  |
| H    | 4.247  | 0.927  | -0.723 |
| C    | 5.279  | -1.020 | 1.859  |
| H    | 3.971  | -2.145 | 3.158  |
| H    | 6.321  | 0.197  | 0.431  |
| O    | 6.460  | -1.397 | 2.443  |
| H    | 6.265  | -1.997 | 3.180  |
| C    | 0.945  | -0.568 | -1.103 |
| C    | -0.446 | -0.436 | -1.363 |
| C    | 1.642  | -1.537 | -1.855 |
| C    | -1.093 | -1.287 | -2.282 |
| C    | 0.993  | -2.380 | -2.761 |
| C    | -0.375 | -2.253 | -2.974 |
| H    | -2.144 | -1.139 | -2.496 |
| H    | 1.552  | -3.124 | -3.322 |
| O    | -0.951 | -3.094 | -3.885 |
| H    | -1.891 | -2.871 | -3.963 |
| C    | 0.424  | 2.544  | -0.277 |
| C    | -0.864 | 1.872  | -0.337 |
| C    | 0.444  | 3.842  | 0.108  |
| C    | -2.042 | 2.609  | 0.097  |
| C    | -0.768 | 4.627  | 0.469  |
| H    | 1.383  | 4.382  | 0.211  |
| C    | -2.041 | 3.907  | 0.470  |
| H    | -2.942 | 4.434  | 0.764  |
| O    | -0.670 | 5.817  | 0.776  |
| O    | -3.133 | 1.803  | 0.074  |
| C    | -2.766 | 0.512  | -0.479 |
| O    | -3.463 | 0.354  | -1.689 |
| H    | -4.410 | 0.349  | -1.468 |
| C    | -3.127 | -0.555 | 0.550  |
| C    | -2.941 | -0.314 | 1.916  |
| C    | -3.624 | -1.804 | 0.155  |
| C    | -3.245 | -1.288 | 2.862  |

|   |        |        |        |
|---|--------|--------|--------|
| H | -2.569 | 0.650  | 2.249  |
| C | -3.935 | -2.785 | 1.092  |
| H | -3.773 | -2.015 | -0.899 |
| C | -3.745 | -2.530 | 2.453  |
| H | -3.102 | -1.080 | 3.921  |
| H | -4.325 | -3.751 | 0.786  |
| O | -4.066 | -3.523 | 3.331  |
| H | -3.891 | -3.218 | 4.235  |
| O | 2.990  | -1.654 | -1.696 |
| H | 3.312  | -2.363 | -2.274 |

Table S4. TDDFT results for the optimized conformer of compound (7aR, 8aR, 7bR)-2 (200nm< $\lambda$ <600nm). The TDDFT calculations are done at the level of B3LYP/6-31G(d) in the PCM model (CH<sub>3</sub>OH solvent: dielectric constant  $\epsilon=32.63$ ).

| Transition | Excitation energy <sup>a</sup><br>(nm) | Rotatory Strength $R^b$<br>(10 <sup>-40</sup> cgs) | Oscillator<br>Strength $f^b$ | Dominant<br>Contributions <sup>c</sup> | Weight       |
|------------|----------------------------------------|----------------------------------------------------|------------------------------|----------------------------------------|--------------|
| 2          | 468.92                                 | 20.2392                                            | 0.0151                       | 125 → 127<br>126 → 127                 | 0.11<br>0.26 |
| 4          | 388.61                                 | -28.0819                                           | 0.1250                       | 122 → 127<br>124 → 127                 | 0.20<br>0.15 |
| 5          | 378.57                                 | -70.7110                                           | 0.2493                       | 122 → 127<br>124 → 127                 | 0.20<br>0.20 |
| 6          | 362.02                                 | 16.6995                                            | 0.0739                       | 121 → 127                              | 0.36         |
| 9          | 296.93                                 | -21.5154                                           | 0.0409                       | 117 → 127                              | 0.36         |
| 10         | 290.56                                 | -22.1269                                           | 0.1405                       | 117 → 127<br>119 → 127                 | 0.13<br>0.22 |
| 24         | 233.72                                 | -22.6919                                           | 0.0247                       | 114 → 127<br>124 → 130                 | 0.13<br>0.19 |
| 33         | 222.26                                 | -18.2217                                           | 0.0267                       | 124 → 131                              | 0.29         |
| 36         | 218.74                                 | -62.1837                                           | 0.0633                       | 122 → 127                              | 0.11         |
| 37         | 218.49                                 | 19.9538                                            | 0.0243                       | 122 → 129                              | 0.12         |
| 38         | 217.54                                 | 39.8335                                            | 0.0512                       | 123 → 129                              | 0.10         |
| 39         | 216.85                                 | 28.0179                                            | 0.0145                       | 121 → 129<br>122 → 130                 | 0.14<br>0.21 |
| 41         | 212.80                                 | 18.3992                                            | 0.0415                       | 112 → 127                              | 0.18         |
| 43         | 211.46                                 | 49.9723                                            | 0.0492                       | 125 → 134                              | 0.06         |
| 44         | 210.98                                 | -53.7444                                           | 0.0444                       | 121 → 130                              | 0.22         |
| 45         | 210.72                                 | 33.4481                                            | 0.0130                       | 111 → 127                              | 0.13         |

<sup>a</sup> Excited states with  $f < 0.1$  and  $R < \pm 15.0$  were not presented.

<sup>b</sup> All the strengths were in the velocity representation.

<sup>c</sup> Configurations with weights below 0.10 were not displayed.

Table S5. The Cartesian coordinates of the optimized structure for **3** within PCM model (CH<sub>3</sub>OH solvent: dielectric constant  $\epsilon=32.63$ ) at B3LYP/6-31G(d) level.

| Atom | X      | Y      | Z      |
|------|--------|--------|--------|
| C    | 1.050  | 0.814  | -0.046 |
| C    | -1.970 | 1.409  | 0.808  |
| C    | -1.796 | 0.118  | -0.048 |
| C    | -3.141 | -0.525 | -0.389 |
| C    | -4.243 | -0.496 | 0.474  |
| C    | -3.316 | -1.124 | -1.643 |
| C    | -5.472 | -1.039 | 0.104  |
| H    | -4.133 | -0.058 | 1.462  |
| C    | -4.534 | -1.682 | -2.029 |
| H    | -2.480 | -1.155 | -2.341 |
| C    | -5.624 | -1.639 | -1.153 |
| H    | -6.318 | -1.005 | 0.791  |
| H    | -4.657 | -2.141 | -3.008 |
| O    | -6.804 | -2.188 | -1.576 |
| H    | -7.482 | -2.092 | -0.872 |
| C    | -0.941 | 2.458  | 0.432  |
| C    | 0.356  | 2.077  | 0.066  |
| C    | -1.245 | 3.821  | 0.427  |
| C    | 1.301  | 3.066  | -0.252 |
| C    | -0.279 | 4.791  | 0.086  |
| C    | 1.029  | 4.424  | -0.261 |
| C    | -0.707 | -0.855 | 0.460  |
| C    | 0.667  | -0.543 | 0.240  |
| C    | -0.977 | -2.107 | 1.024  |
| C    | 1.734  | -1.507 | 0.328  |
| C    | 0.050  | -3.047 | 1.204  |
| C    | 1.358  | -2.787 | 0.832  |
| C    | 4.172  | -2.075 | -0.155 |
| C    | 5.448  | -1.691 | -0.555 |
| H    | 4.020  | -3.113 | 0.093  |
| C    | 4.712  | 0.574  | -0.844 |
| C    | 5.730  | -0.355 | -0.899 |
| H    | 4.904  | 1.611  | -1.107 |
| O    | -2.240 | -2.425 | 1.408  |
| H    | -2.273 | -3.365 | 1.694  |
| O    | 2.301  | -3.760 | 0.988  |
| H    | 1.879  | -4.576 | 1.340  |
| H    | -0.195 | -4.020 | 1.633  |
| C    | 2.348  | 1.135  | -0.368 |
| C    | 3.410  | 0.203  | -0.449 |
| C    | 3.103  | -1.151 | -0.078 |
| H    | 6.735  | -0.068 | -1.206 |
| O    | 6.403  | -2.667 | -0.599 |
| H    | 7.258  | -2.283 | -0.896 |
| O    | 2.524  | 2.495  | -0.529 |

|   |        |       |        |
|---|--------|-------|--------|
| H | -1.414 | 0.471 | -1.016 |
| H | -2.968 | 1.838 | 0.609  |
| O | -1.880 | 1.038 | 2.191  |
| H | -2.119 | 1.828 | 2.720  |
| O | -0.567 | 6.125 | 0.076  |
| H | -1.502 | 6.268 | 0.344  |
| H | 1.773  | 5.173 | -0.515 |
| H | -2.251 | 4.151 | 0.688  |

Table S6. TDDFT results for the optimized conformer of compound (7aR, 8aR)-**3** (200nm< $\lambda$ <600nm). The TDDFT calculations are done at the level of B3LYP/6-31G(d) in the PCM model (CH<sub>3</sub>OH solvent: dielectric constant  $\epsilon=32.63$ ).

| Transition | Excitation energy <sup>a</sup><br>(nm) | Rotatory Strength<br>$R^b$<br>(10 <sup>-40</sup> cgs) | Oscillator<br>Strength $f^b$ | Dominant<br>Contributions <sup>c</sup> | Weight               |
|------------|----------------------------------------|-------------------------------------------------------|------------------------------|----------------------------------------|----------------------|
| 1          | 357.47                                 | -23.4709                                              | 0.3012                       | 121 → 122                              | 0.36                 |
| 2          | 343.16                                 | -21.2557                                              | 0.1386                       | 121 → 123                              | 0.32                 |
| 3          | 308.97                                 | -12.1778                                              | 0.1331                       | 120 → 122                              | 0.31                 |
| 5          | 287.95                                 | 22.7403                                               | 0.0440                       | 121 → 124                              | 0.41                 |
| 6          | 285.12                                 | -17.2423                                              | 0.1033                       | 118 → 122                              | 0.30                 |
| 7          | 279.25                                 | -21.1226                                              | 0.4884                       | 120 → 123                              | 0.28                 |
| 9          | 271.95                                 | 17.1501                                               | 0.2131                       | 121 → 125                              | 0.26                 |
| 11         | 262.49                                 | 59.0263                                               | 0.1940                       | 118 → 123<br>120 → 124<br>121 → 126    | 0.14<br>0.33<br>0.15 |
| 12         | 255.36                                 | 0.1334                                                | 0.1380                       | 117 → 122                              | 0.34                 |
| 13         | 249.96                                 | 25.8374                                               | 0.0631                       | 120 → 124                              | 0.23                 |
| 21         | 238.85                                 | -23.7552                                              | 0.0146                       | 120 → 126                              | 0.36                 |
| 22         | 232.08                                 | 21.3873                                               | 0.0765                       | 119 → 125                              | 0.39                 |
| 23         | 228.91                                 | -8.8636                                               | 0.2678                       | 118 → 124                              | 0.25                 |
| 31         | 215.64                                 | 37.8311                                               | 0.0254                       | 118 → 126                              | 0.26                 |
| 40         | 203.83                                 | -15.7421                                              | 0.0359                       | 116 → 124                              | 0.31                 |

<sup>a</sup> Excited states with  $f < 0.1$  and  $R < \pm 15.0$  were not presented.

<sup>b</sup> All the strengths were in the velocity representation.

<sup>c</sup> Configurations with weights below 0.10 were not displayed.
